# Supplementary material for: Microbial metabolic networks in a complex electrogenic biofilm recovered from a stimulus-induced metatranscriptomics approach
Source: PubMed Central journal article supplement (PMC4595844; doi:10.1038/srep14840), 2015-10-07
Supplement: srep14840-s1.pdf [file srep14840-s1.pdf]

# Microbial metabolic networks in a complex electrogenic biofilm recovered from a stimulus-induced metatranscriptomics approach

Shun'ichi Ishii\*, Shino Suzuki\*, Aaron Tenney, Trina M. Norden-Krichmar,  
Kenneth H. Nealson, Orianna Bretschger

\* Corresponding authors  
SI, E-mail: sishii@jamstec.go.jp; Tel: +81-88-878-2279; Fax: +81-88-878-2192  
SS, E-mail: sisuzuki@jamstec.go.jp; Tel: +81-88-878-2224; Fax: +81-88-878-2192

## SUPPLEMENTARY INFORMATION

### Table of Contents

|                                                                                      |           |
|--------------------------------------------------------------------------------------|-----------|
| <b>SUPPLEMENTARY FIGURES.....</b>                                                    | <b>2</b>  |
| <b>SUPPLEMENTARY TABLES .....</b>                                                    | <b>16</b> |
| <b>SUPPLEMENTARY DISCUSSION.....</b>                                                 | <b>31</b> |
| Characterization of thirteen bin-genomes.....                                        | 31        |
| Accurate community composition for complex microbial community.....                  | 31        |
| Stimulus-induced metatranscriptomics for natural environmental community .....       | 32        |
| <b>SUPPLEMENTARY METHODS .....</b>                                                   | <b>33</b> |
| Selection of marker genes for analyzing cell activity and microbial metabolisms..... | 33        |
| <b>SUPPLEMENTARY REFERENCES.....</b>                                                 | <b>34</b> |

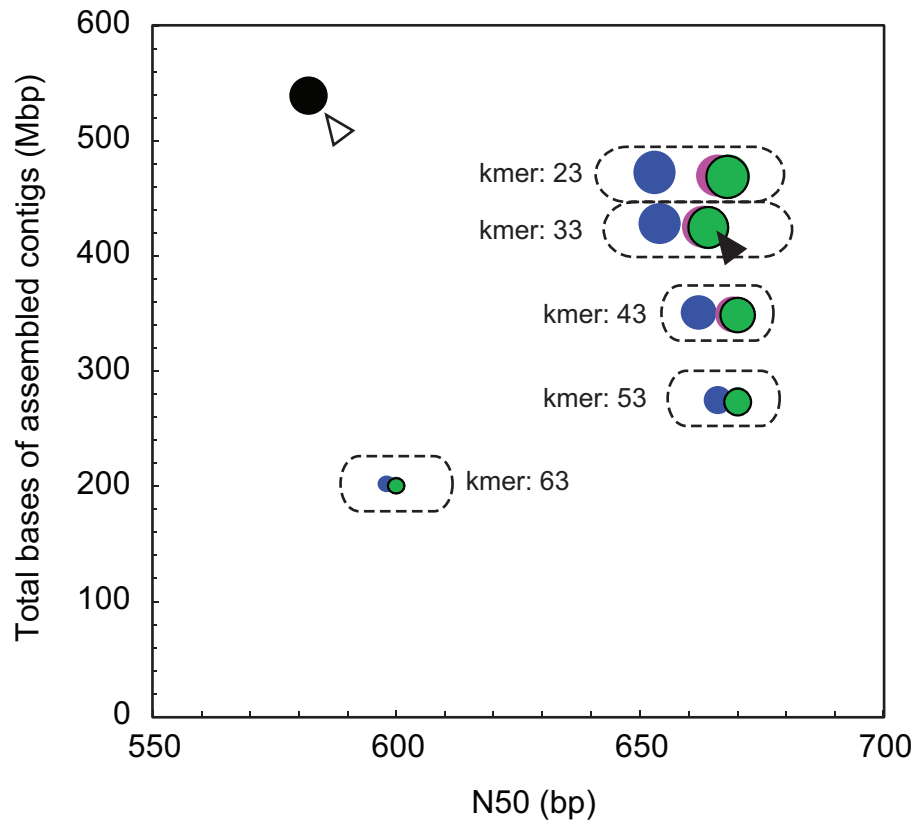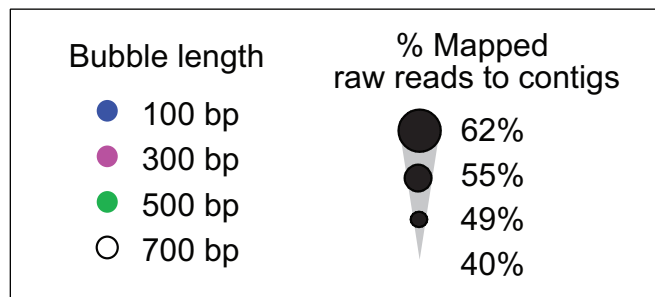

**Supplementary Fig. S1 | Metagenomic assembly metrics with the various parameters on *de novo* assembly software.**

Three metagenomic assembly metrics, total bases (y-axis), N50 (x-axis), and % mapped raw reads back to the assembled contigs (size of bubble), are shown with different parameters of both kmer size (dashed line) and bubble length (color) in CLC *de novo* assembly cell 4.0. Open arrowhead indicates an assembly used in previous study (Ishii et al. 2013. Nature Commun. 4: 1601). Filled arrowhead indicates an assembly used in this study.

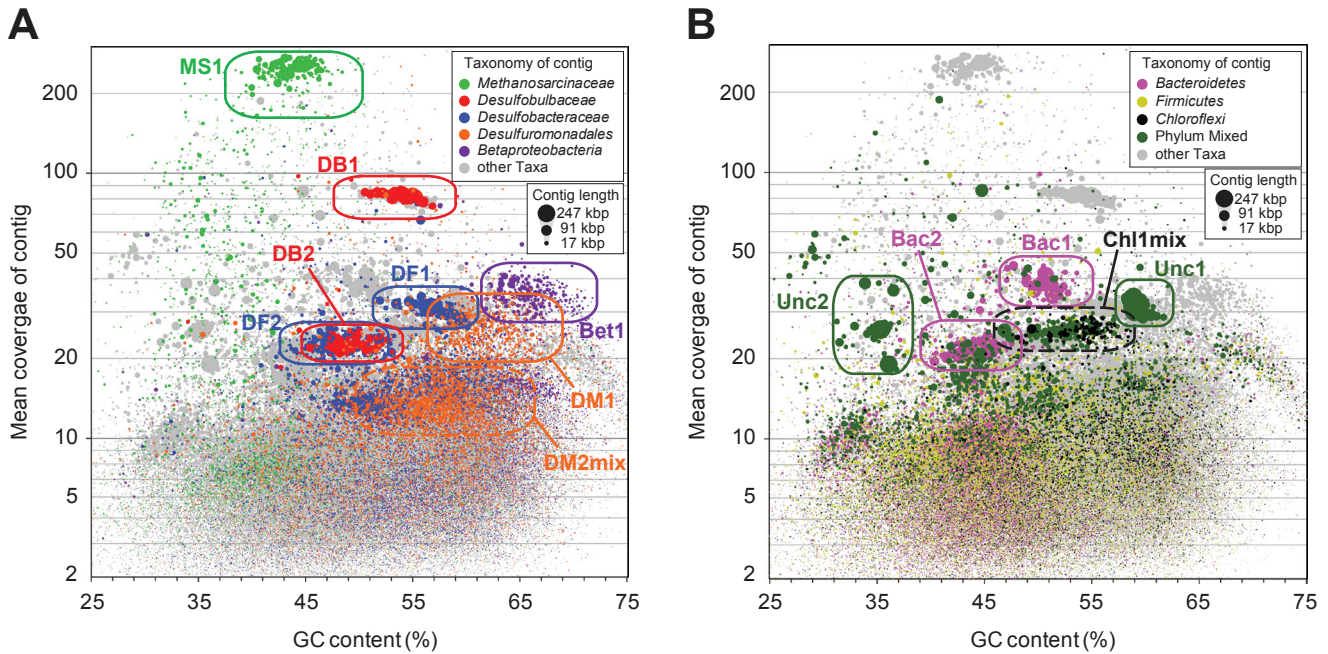

**Supplementary Fig. S2 | Identified Bin-genomes of dominant strains within the EET-active microbial community.**

Panel A shows Bin-genome clusters (colored rounded rectangles) for taxa related to Phylum Proteobacteria and Family Methanosarcinaceae, while panel B shows Bin-genome clusters for the other taxa. Bin-genomes (ID described near rounded rectangles) were established using the estimated taxonomic classification of contigs (color of dots), contig lengths (size of dots), GC content of contigs (%), and mean coverage of contig.

# 16S rRNA

0.05

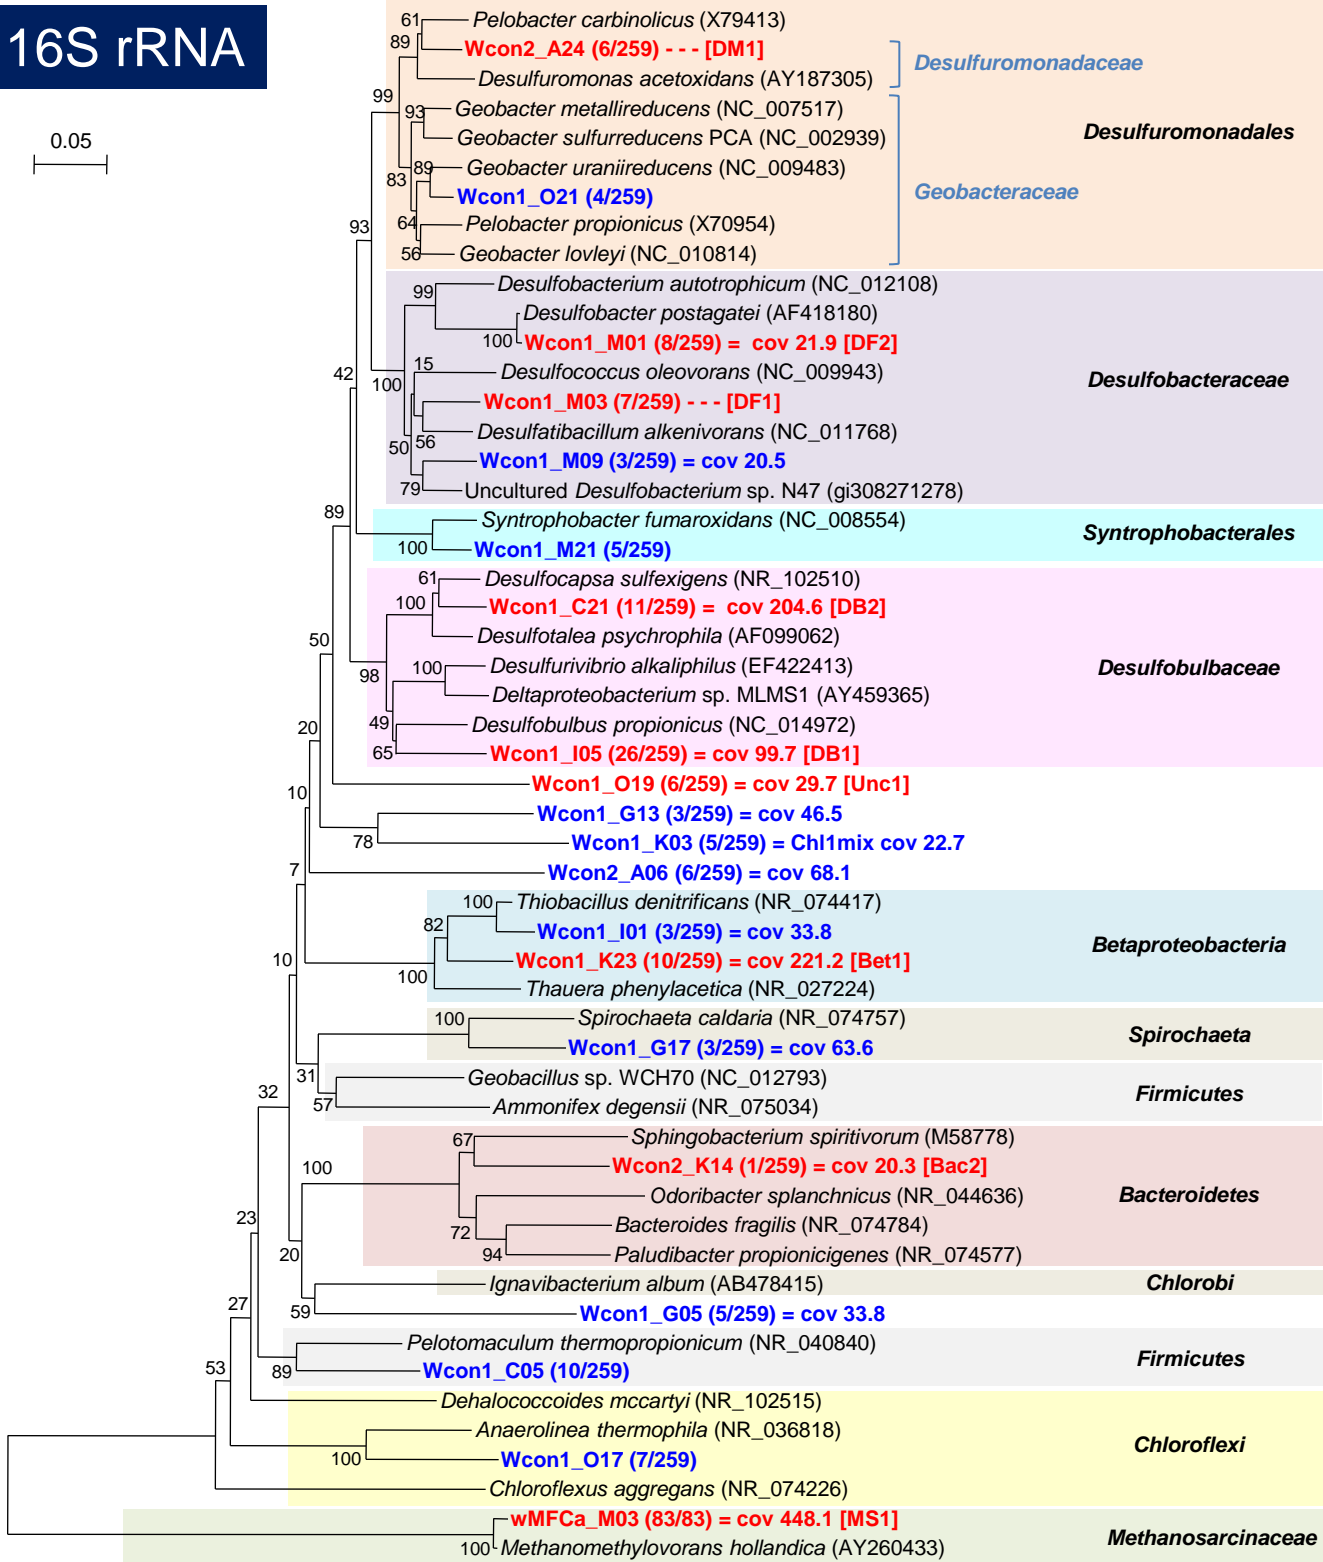

**Supplementary Fig. S3 | Neighbor-joining phylogenetic tree of 16S rRNA showing positions of abundant phylotypes (clones >3) from 16S rRNA clone analysis.**

The 21 abundantly observed 16S rRNA genes in the community are described as “clone ID (numbers in the clone library / total clones analyzed) = contig coverage value if the 16S rRNA sequence was observed in the metagenomic assembly [Bin-genome ID]”. Phylogenetic position of the Bin-genome DB1 and DF1 were estimated by comparison between topologies of three housekeeping genes as described in Supplementary Figs. S3-S5. Bootstrap values (100 trials) are described at each branch point. Accession numbers of reference sequences are indicated in parentheses.

**RpIE**

0.1

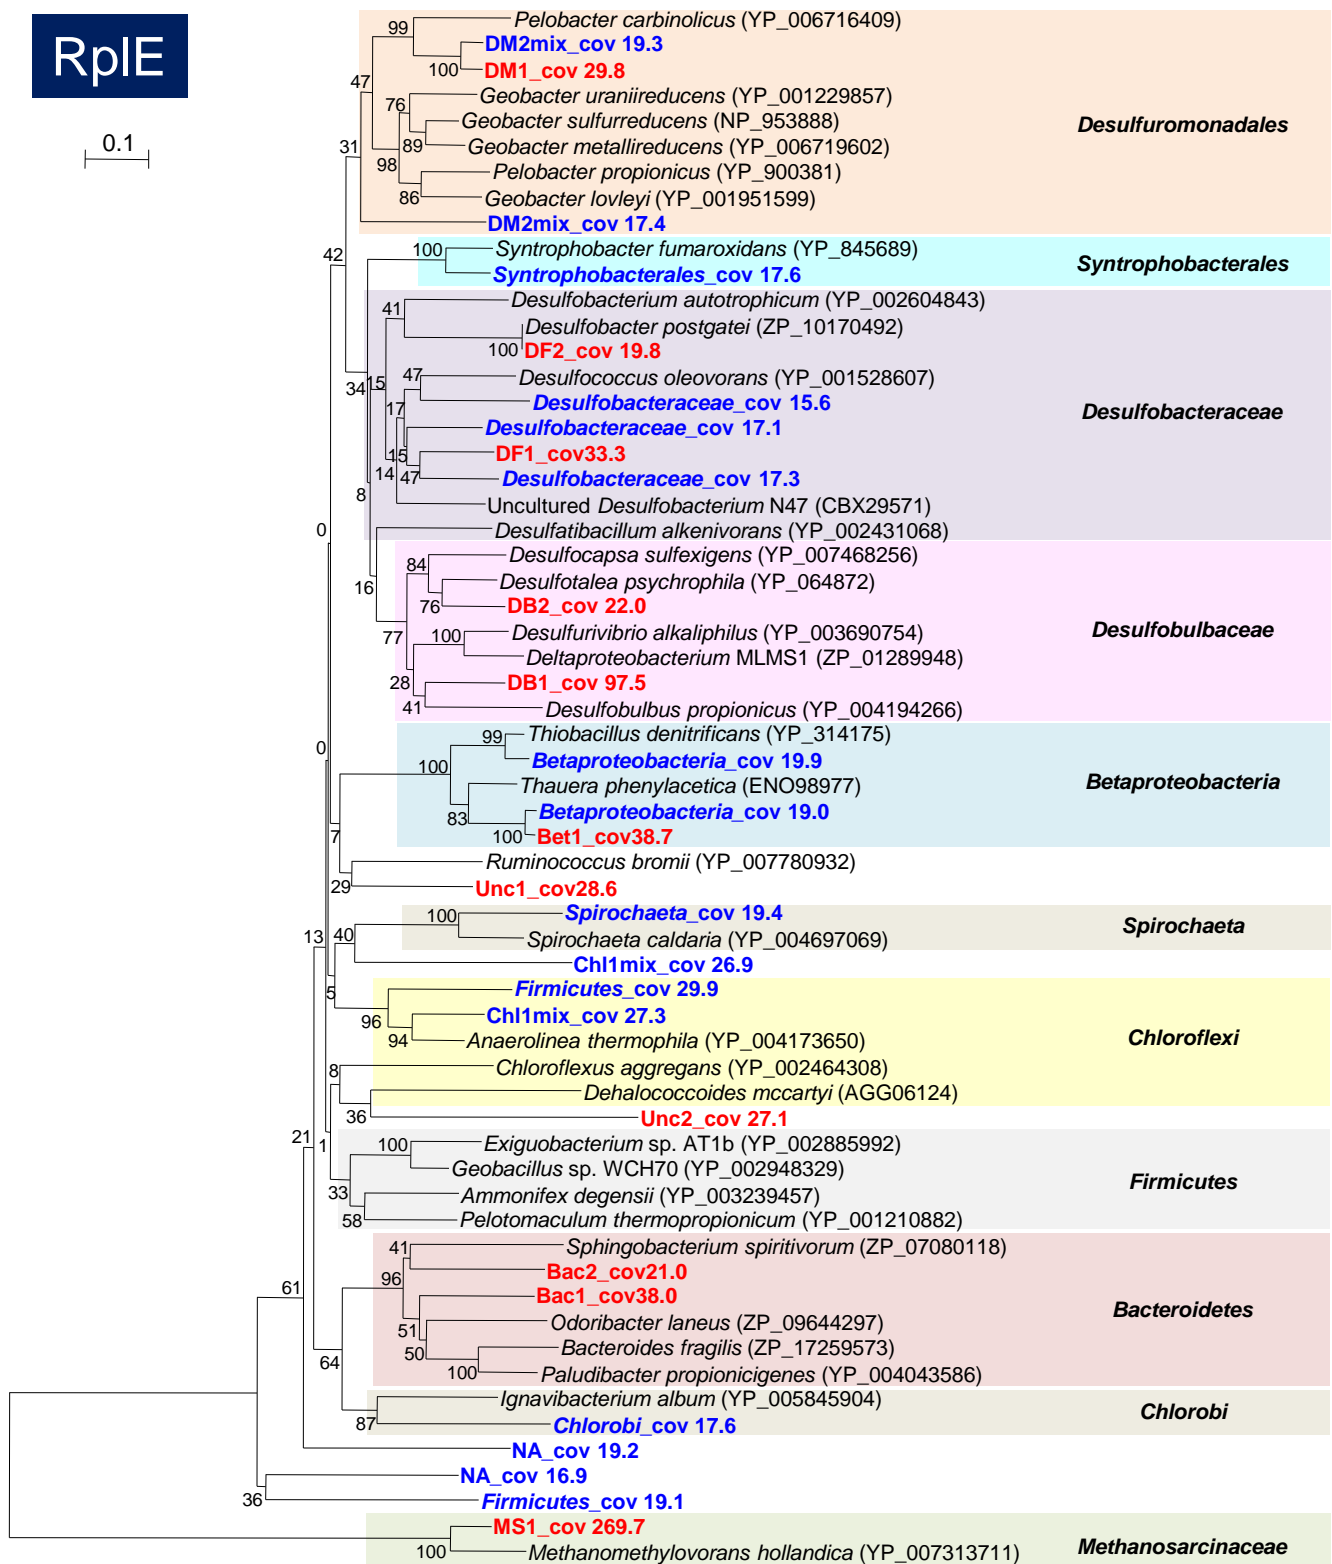

**Supplementary Fig. S4 | Neighbor-joining phylogenetic tree of RpIE peptides showing positions of abundant phylotypes (contig coverage >15) including bin-genomes.**

The 26 abundantly observed RpIE peptides in the community are described as “bin-genome ID (or taxonomic assignment of the contig)\_contig coverage value”. Bootstrap values (100 trials) are described at each branch point. Accession numbers of reference sequences are indicated in parentheses.

# NusA

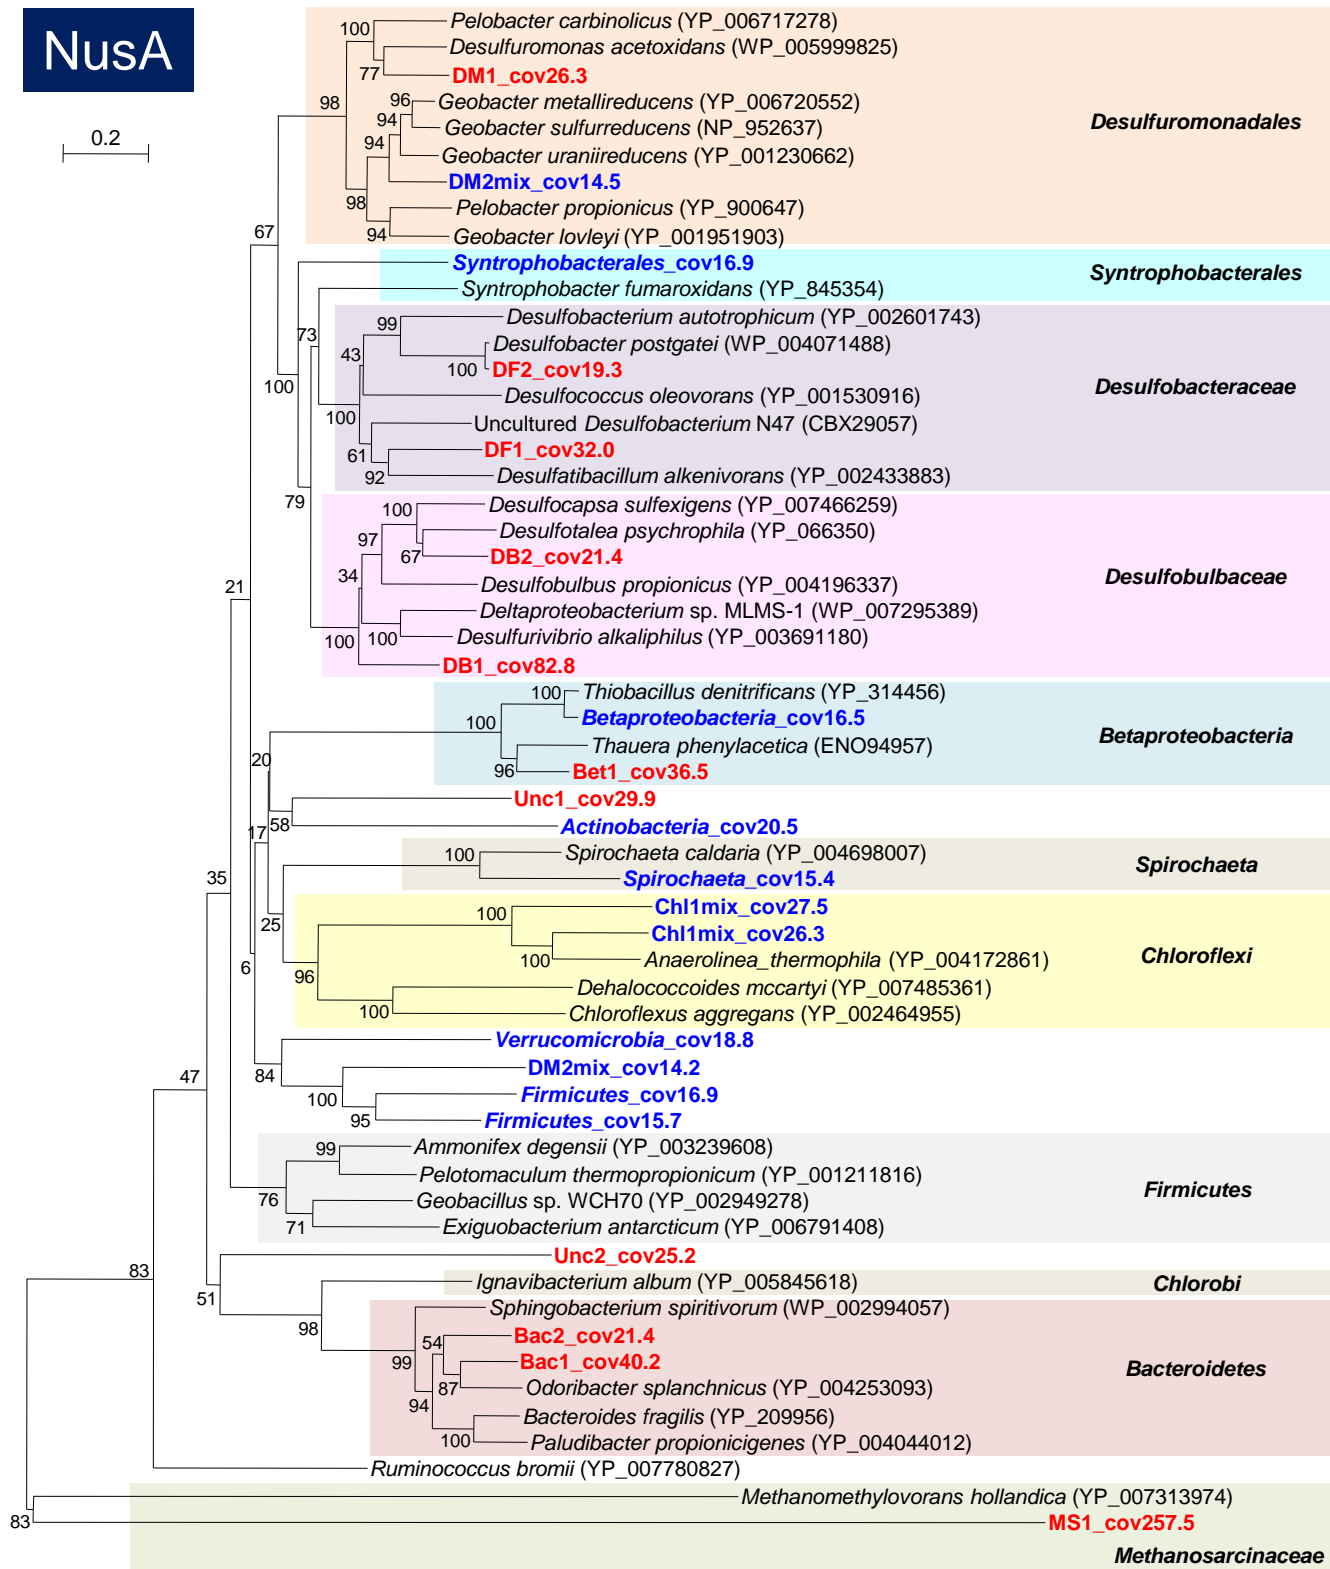

**Supplementary Fig. S5 | Neighbor-joining phylogenetic tree of NusA peptides showing positions of abundant phylotypes (contig coverage >13) including bin-genomes.**

The 22 abundantly observed NusA peptides in the community are described as “bin-genome ID (or taxonomic assignment of the contig)\_contig coverage value”. Bootstrap values (100 trials) are described at each branch point. Accession numbers of reference sequences are indicated in parentheses.



# PheS

0.1

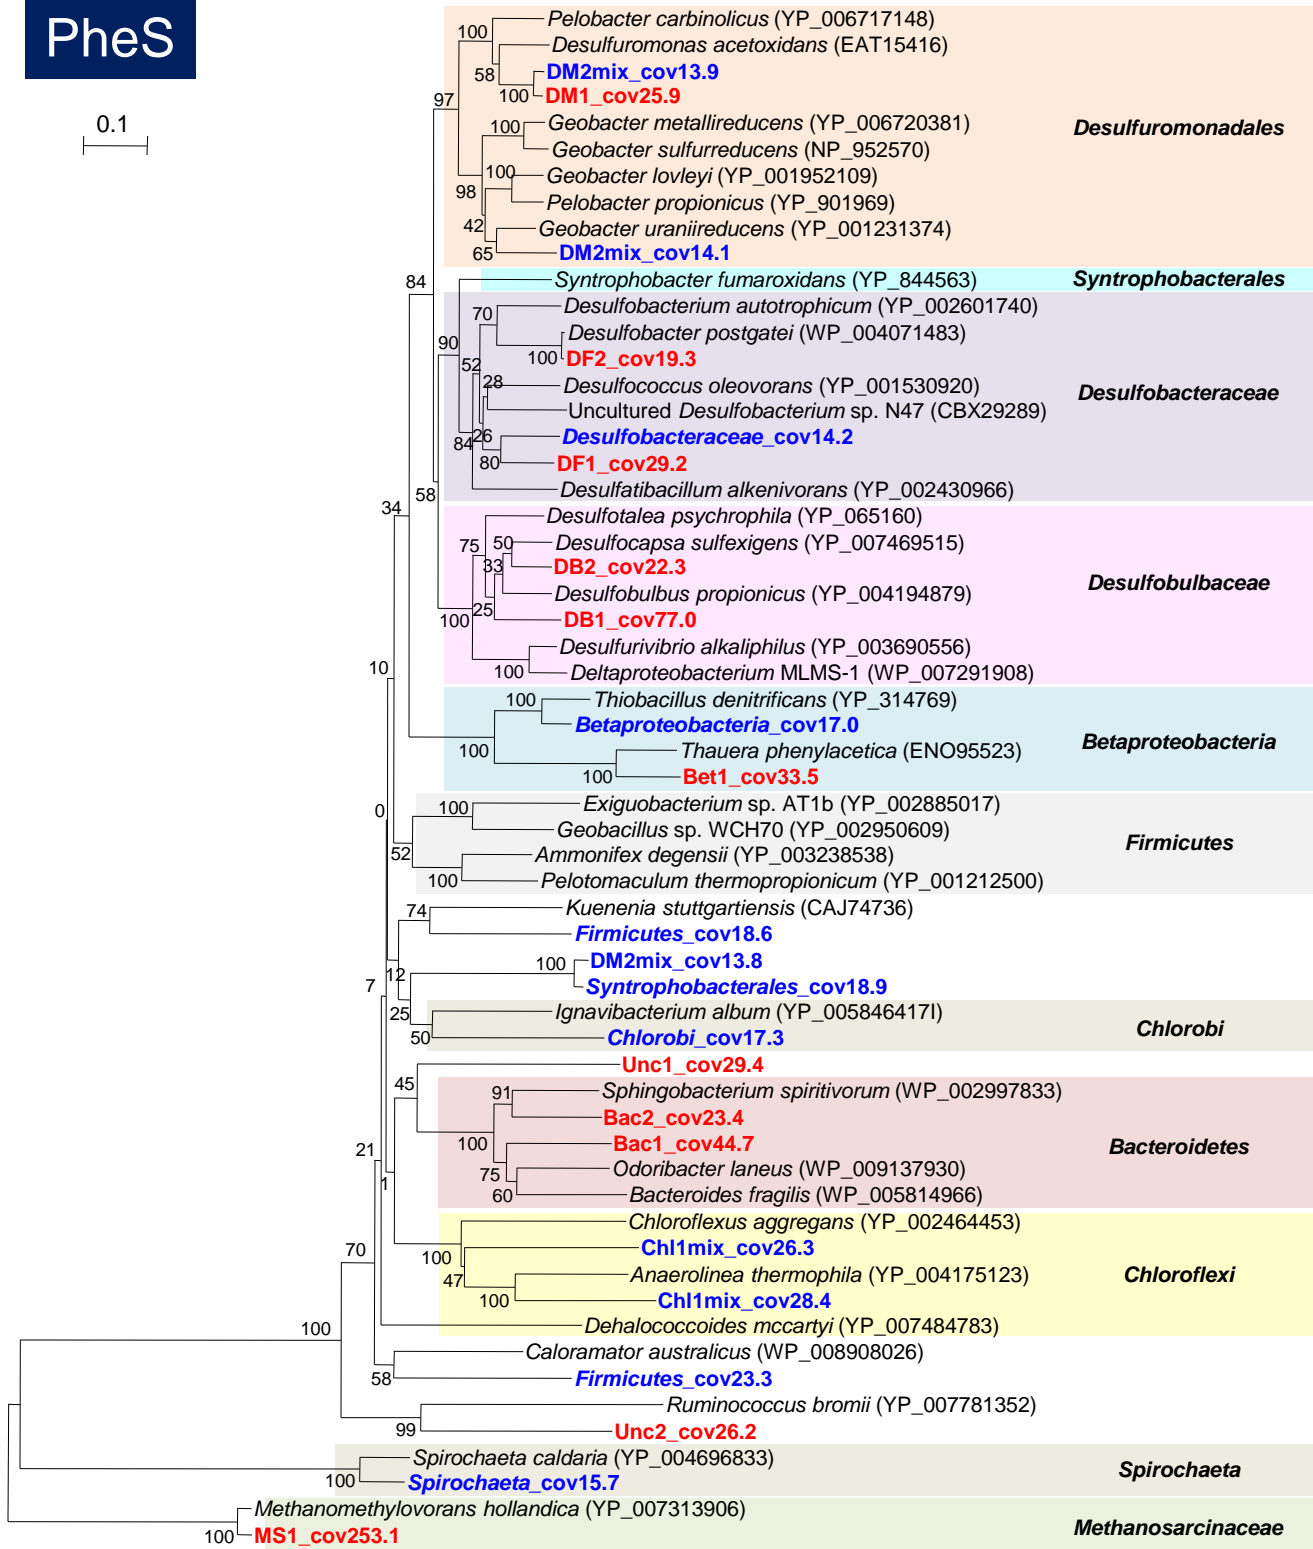

**Supplementary Fig. S6 | Neighbor-joining phylogenetic tree of PheS peptides showing positions of abundant phylotypes (contig coverage >13) including bin-genomes.**

The 23 abundantly observed PheS peptides in the community are described as “bin-genome ID (or taxonomic assignment of the contig)\_contig coverage value”. Bootstrap values (100 trials) are described at each branch point. Accession numbers of reference sequences are indicated in parentheses.

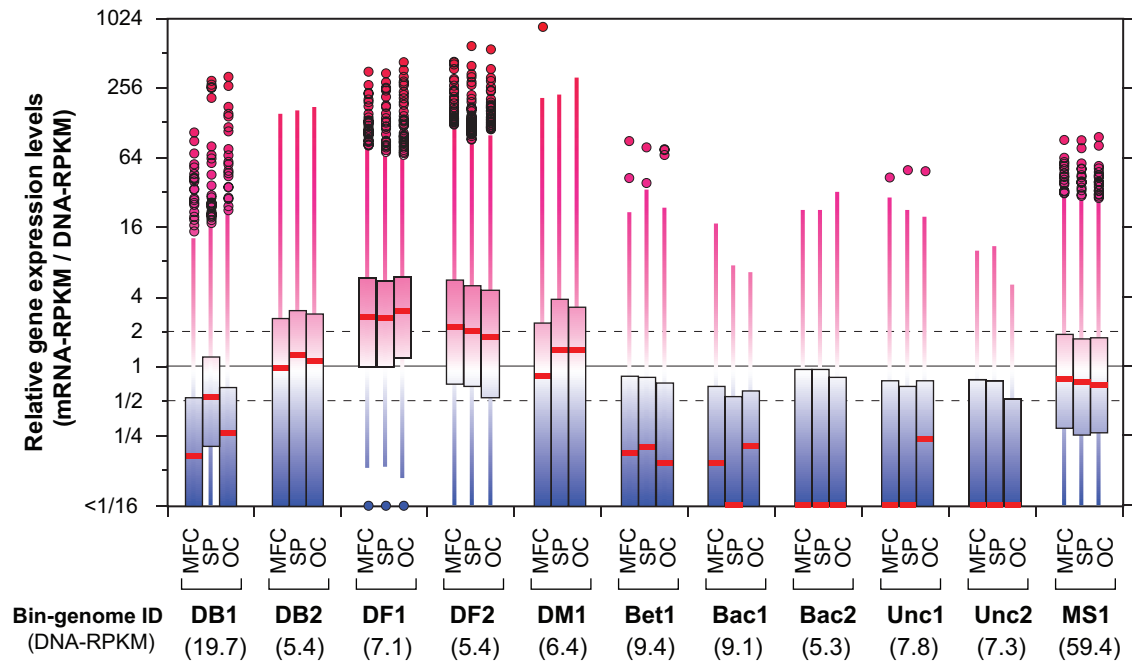

**Supplementary Fig. S7 | Gene expression levels of each bin-genome within the EET-active microbial community.**

Box-plot diagram showing the normalized gene expression levels of CDSs in each bin-genome for three different operational conditions (MFC, SP, and OC) based on DNA-RPKM (parenthesis below bin-genome ID). The box signifies the upper and lower quartiles, the bar signifies the upper and lower adjacent values, and the median is represented by a red line within the box for each sample. CDSs showed over upper adjacent value and under lower adjacent value are depicted by circles.





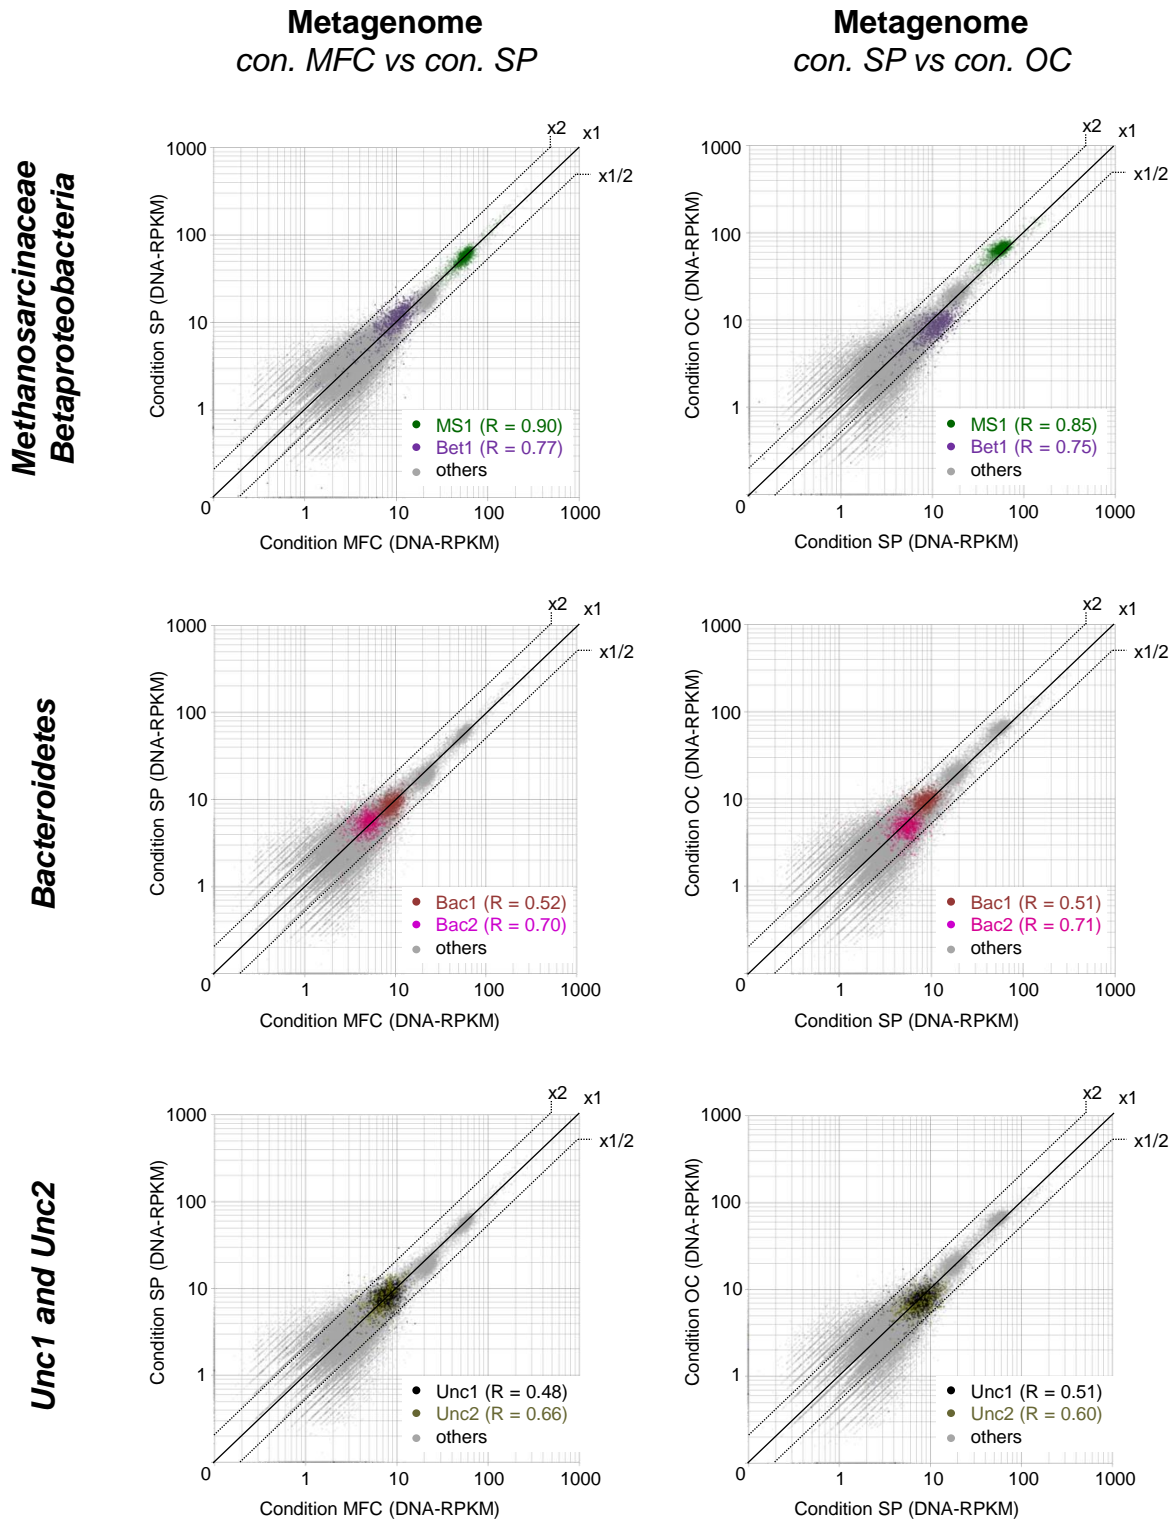

**Supplementary Fig. S9. Scatter plots of CDSs for non-Deltaproteobacterial bin-genomes with DNA frequency between two operational conditions.**

Left panels show the relationship between MFC and SP conditions. Right panels show the relationship between SP and OC conditions. The correlation coefficient (R) is shown.

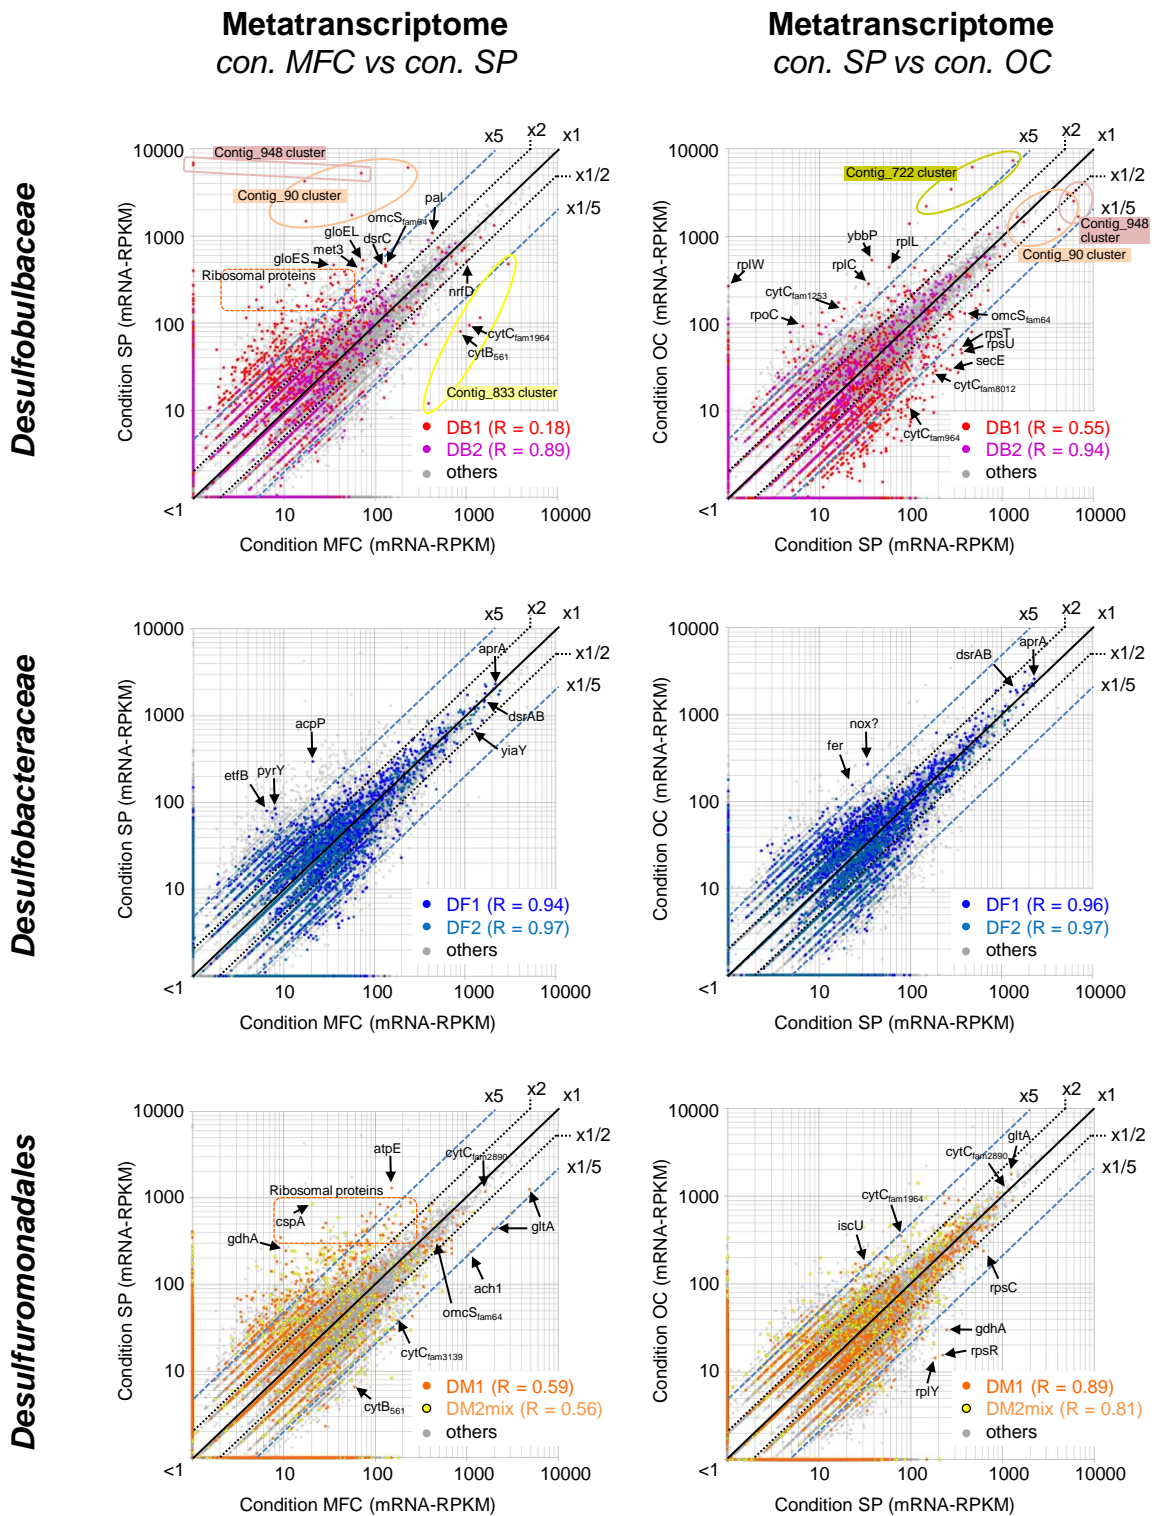

**Supplementary Fig. S10. Scatter plots of CDSs for *Deltaproteobacterial* bin-genomes with mRNA frequency between two operational conditions.**

Left panels show the relationship between MFC and SP conditions. Right panels show the relationship between SP and OC conditions. The correlation coefficient (R) is shown.

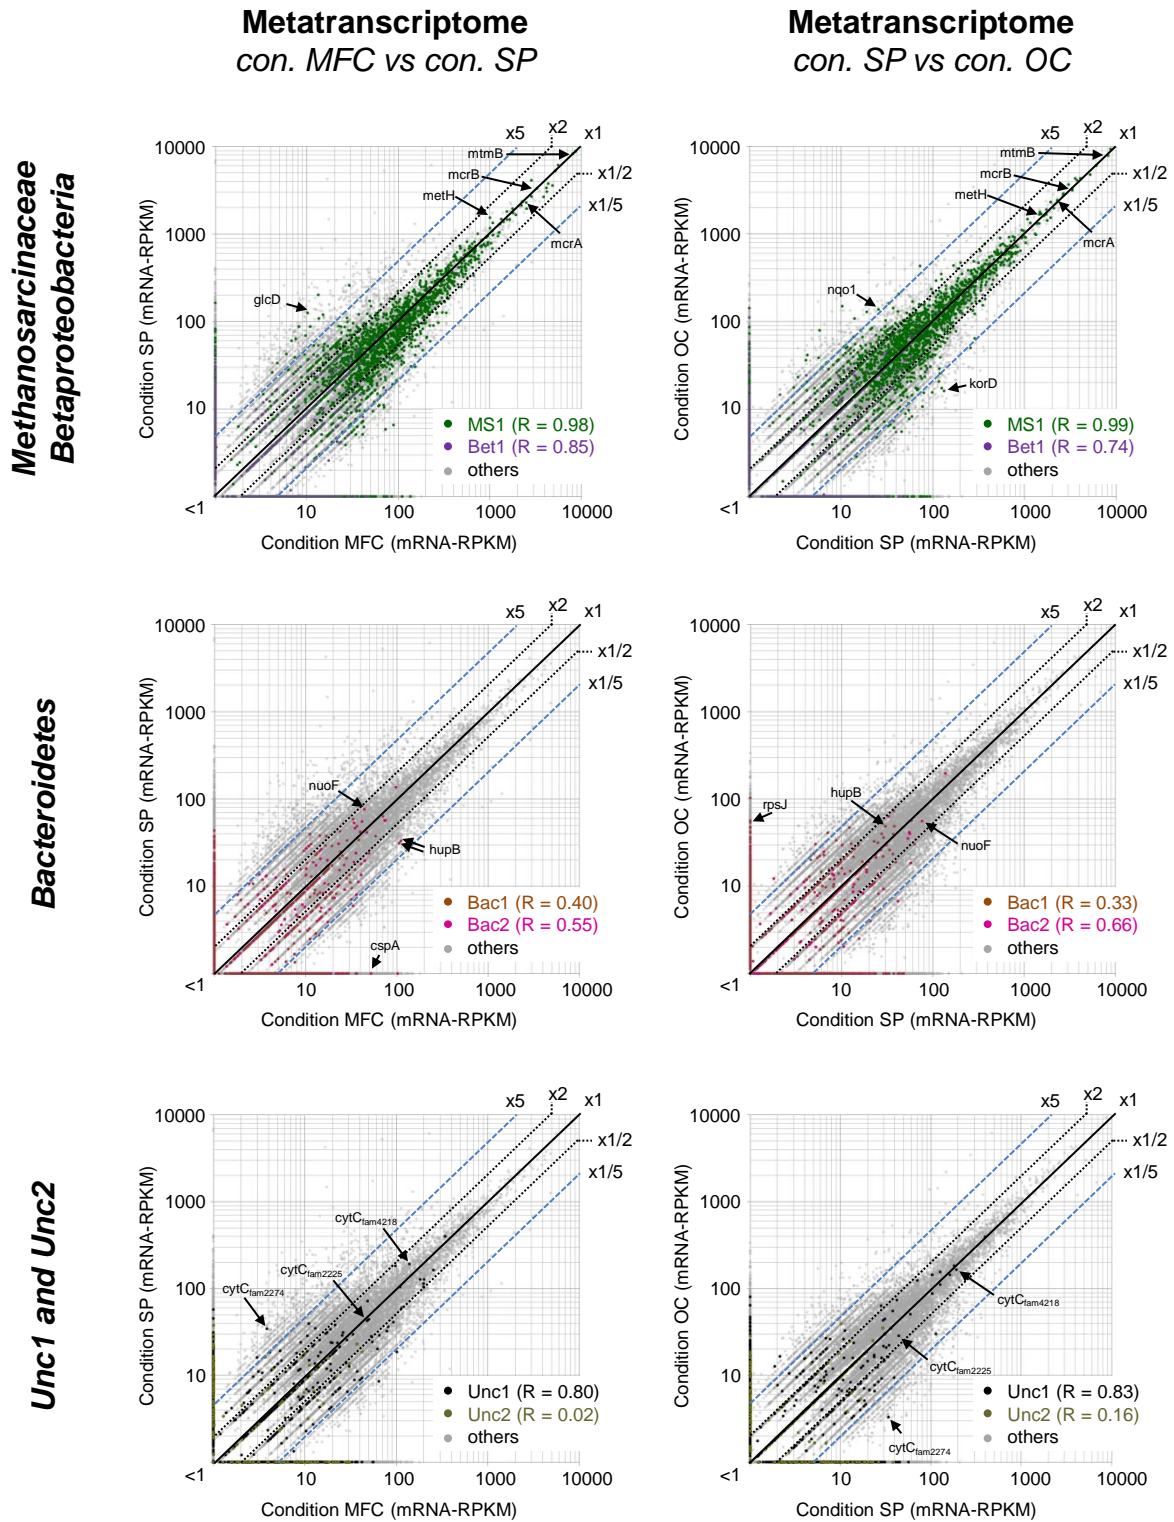

**Supplementary Fig. S11. Scatter plots of CDSs for non-Deltaproteobacterial bin-genomes with mRNA frequency between two operational conditions.**

Left panels show the relationship between MFC and SP conditions. Right panels show the relationship between SP and OC conditions. The correlation coefficient (R) is shown.



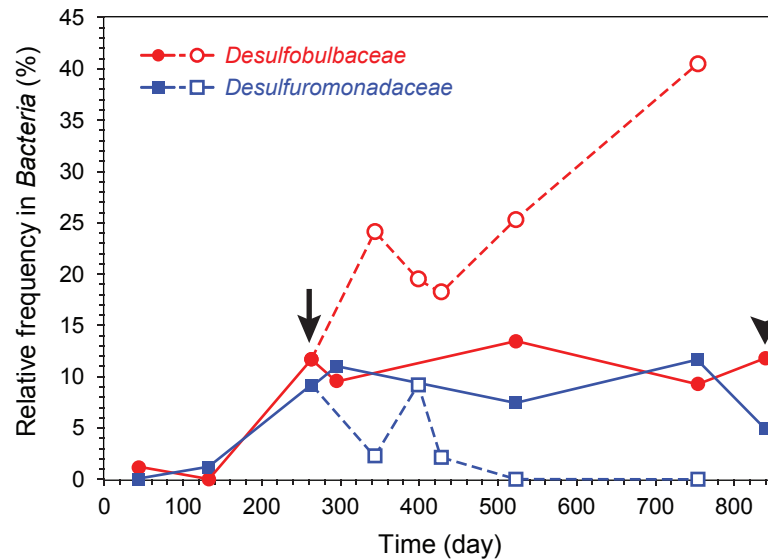

**Supplementary Fig. S12 | Comparison of long-term community dynamics between *Desulfobulbaceae* and *Desulfuromonadaceae* after SP stimulus.**

Longer-term population dynamics of those two EET-responsive families, family *Desulfobulbaceae* (red circle) and family *Desulfuromonadaceae* (blue square) suggested from the stimulus-induced metatranscriptomics was analyzed by bacterial 16S rRNA-basis community analyses of the anode-associated electrogenic biofilm, which was reported from the previous studies (Ishii et al. 2013 Water Res. 47:7120-30). The MFC was repeatedly fed with wastewater over 800 days (solid symbols), and the stimulus-induced metatranscriptomic analysis of this study was conducted at day 840 of the operation (arrowhead). The intermittent SP operation was started from day 264 by sub-passage to new reactor (arrow), and continuous SP operation was started from day 500 (open symbols).

**MFC#1** (Metagenome)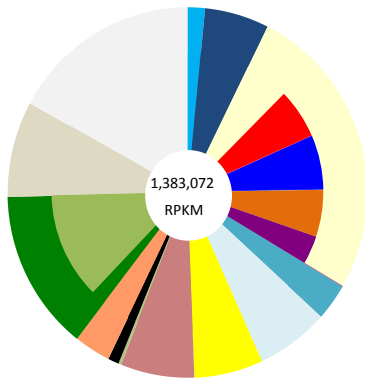**MFC#1** (Bacterial clone analysis)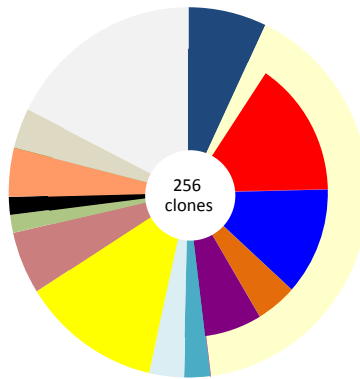**MFC#1** (Archaeal clone analysis)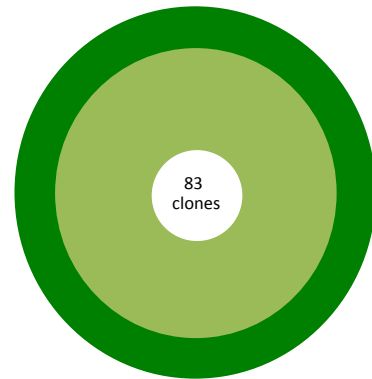**MFC#2** (Bacterial 16S rRNA amplicon sequence by 454 Ti-FLX)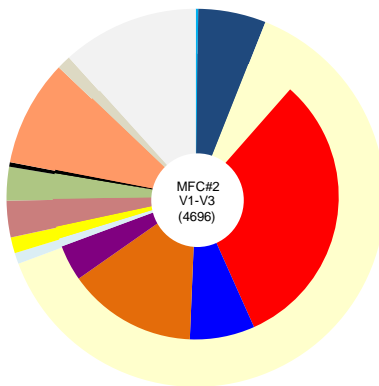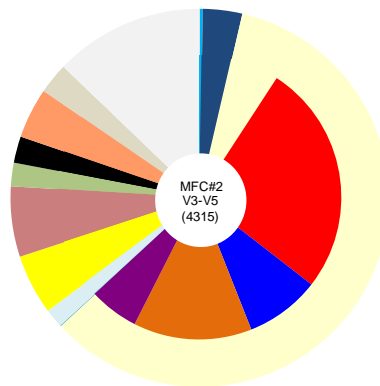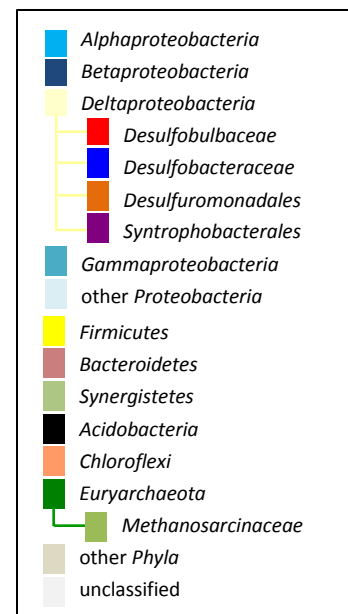**MFC#3** (Bacterial 16S rRNA amplicon sequence by 454 Ti-FLX)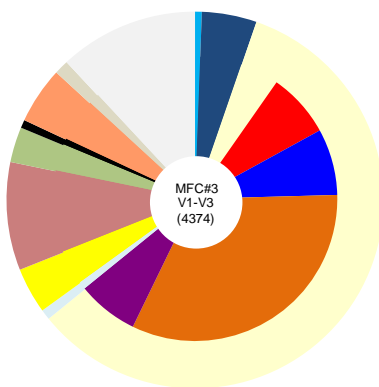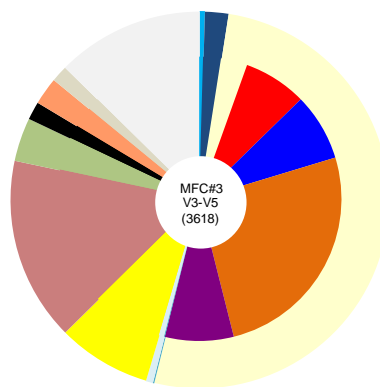**Supplementary Fig. S13 | Electrogenic microbial community compositions in three different wastewater-fed microbial fuel cells.**

MFC#1 was analyzed based on the metagenomic DNA frequency (DNA-RPKM), 16S rRNA clone analyses (total number of sequenced clone is described in center circles) for both *Bacteria* and *Archaea* which are described in previous study (Ishii et. al. 2013. Nat Commun 4:1601). MFC#2 and MFC#3 were analyzed based on 454 pyrosequencing of V1-V3 region or V3-V5 region of 16S rRNA amplicon (number of sequenced reads are described in paraphrase of the center circle), which method is described in previous work (The Human Microbes Project Consortium, 2012. Nature 486: 215–221).



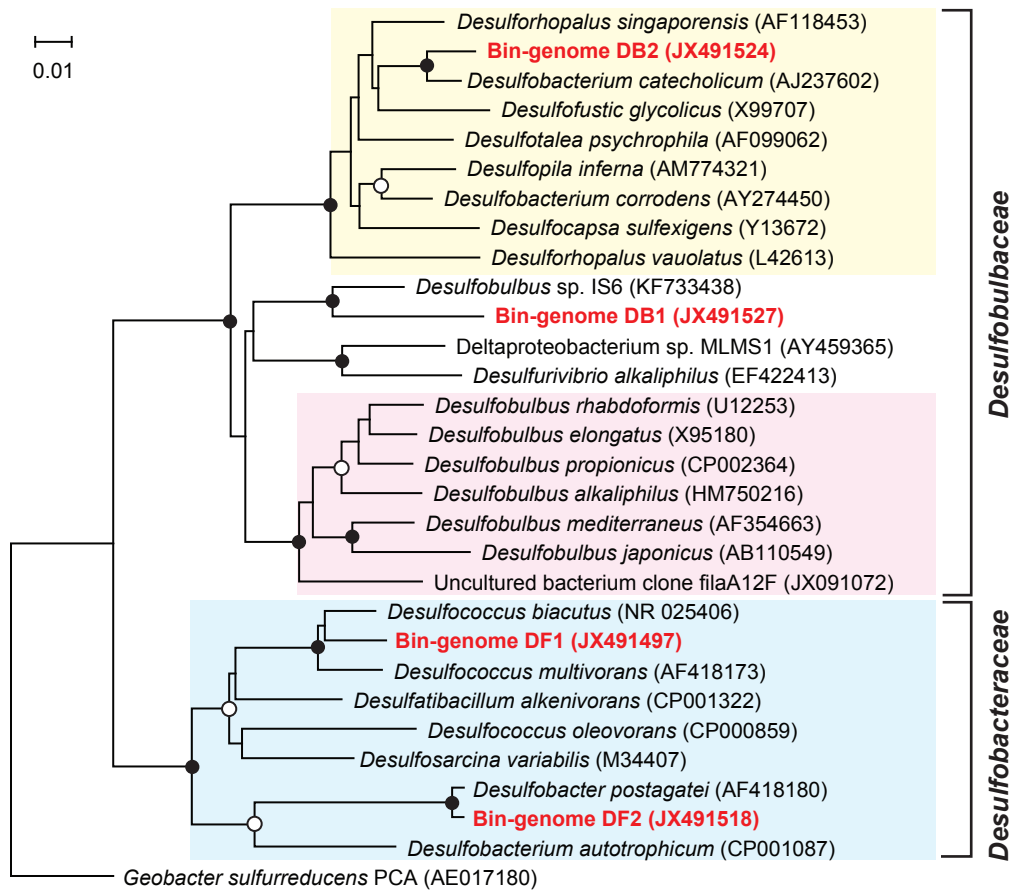

**Supplementary Figure S14. A neighbor-joining tree showing phylogenetic positions of major *Desulfobacterales* bin-genomes representing anodic microbial populations.**

Branch points supported with bootstrap values (100 trials) of >90% are indicated with closed circles, while those between 70% and 90% are indicated with open circles. Accession numbers of reference sequences are indicated in parentheses.

Supplementary Table S1. Statistical parameters of metagenomic assemblies .

| Step ID                                | Length cutoff      | No. of reads <sup>a</sup> | Reads Mapped      | % Mapped     | No. Contigs    | Total Bases (bp)   | Max contig size (bp) | N50 (bp)    | No. contigs >1k |
|----------------------------------------|--------------------|---------------------------|-------------------|--------------|----------------|--------------------|----------------------|-------------|-----------------|
| <b>Raw sequence reads</b>              |                    |                           |                   |              |                |                    |                      |             |                 |
| <i>454 Ti (mated pair)</i>             | -                  | 1,152,579                 | -                 | -            | -              | 184,768,596        | -                    | -           | -               |
| <i>Illumina (fragment)</i>             | -                  | 38,353,992                | -                 | -            | -              | 3,835,399,200      | -                    | -           | -               |
| <i>Illumina (paired end)</i>           | -                  | 69,613,842                | -                 | -            | -              | 6,961,384,200      | -                    | -           | -               |
| <b>Multi-step assembly<sup>b</sup></b> |                    |                           |                   |              |                |                    |                      |             |                 |
|                                        | > 200 bp           | 38,353,992                | 22,448,289        | 58.5%        | 1,005,833      | 539,435,694        | 233,369              | 582         | 73,068          |
|                                        | > 500 bp           | 38,353,992                | 18,479,506        | 48.2%        | 224,995        | 298,152,130        | 233,369              | 1643        | 73,068          |
| <b>CLC assembling cell</b>             |                    |                           |                   |              |                |                    |                      |             |                 |
|                                        | > 200 bp           | 96,354,452                | 60,027,569        | 62.3%        | 717,513        | 424,568,988        | 280,490              | 664         | 57,714          |
|                                        | <b>&gt; 500 bp</b> | <b>96,354,452</b>         | <b>49,837,201</b> | <b>51.7%</b> | <b>169,740</b> | <b>248,451,270</b> | <b>280,490</b>       | <b>2021</b> | <b>57,714</b>   |

<sup>a</sup> Numbers of reads to perform mapping raw reads back to the assembled contigs (with length cutoff 0.8 and similarity cutoff 0.8).

<sup>b</sup> Multi-step assembly procedure is described in the previous paper (Ishii et al. Nature Commun. 4: 1601).

<sup>c</sup> CLC *de novo* assembler using all three phyrosequencing data with word length of 33 and bubble length of 800 (This study).

Supplementary Table S2. summary of criteria for contig groupings used to establish bin-genomes

| Strain                 | Predicted taxonomy                                                       | Relative abundance<br>(Mean coverage) <sup>a</sup> | GC content<br>(%) | Contig length<br>cutoff (bp) |
|------------------------|--------------------------------------------------------------------------|----------------------------------------------------|-------------------|------------------------------|
| <b>Bin-genome MS1</b>  | Phylum <i>Euryarchaeota</i>                                              | 196 - 500                                          | - <sup>c</sup>    | -                            |
| <b>Bin-genome Bac1</b> | Phylum <i>Bacteroidetes</i>                                              | 30 - 50                                            | 45 - 55           | -                            |
| <b>Bin-genome Bac2</b> | Phylum <i>Bacteroidetes</i>                                              | 18 - 26                                            | 37 - 50           | -                            |
| <b>Bin-genome Bet1</b> | Class <i>Betaproteobacteria</i>                                          | 23 - 50                                            | >59               | -                            |
| <b>Chl1mix</b>         | Phylum <i>Mixed</i> <sup>b</sup>                                         | 20 - 32                                            | 40 - 60           | -                            |
|                        | Phylum <i>Chloroflexi</i>                                                | 22 - 28                                            | 45 - 57           | -                            |
| <b>Bin-genome Unc1</b> | Phylum <i>Mixed</i> <sup>b</sup>                                         | 28 - 40                                            | >56               | -                            |
| <b>Bin-genome Unc2</b> | Phylum <i>Mixed</i> <sup>b</sup>                                         | 18 - 40                                            | <40               | -                            |
| <b>Bin-genome DM1</b>  | Order <i>Desulfuromonadales</i>                                          | 20 - 50                                            | -                 | -                            |
| <b>DM2mix</b>          | Order <i>Desulfuromonadales</i>                                          | 10 - 20                                            | -                 | -                            |
| <b>Bin-genome DB1</b>  | Order <i>Desulfobacterales</i>                                           | 70 - 90                                            | -                 | -                            |
|                        | Class <i>Deltaproteobacteria</i>                                         |                                                    |                   | >5000                        |
| <b>Bin-genome DB2</b>  | Family <i>Desulfobulbaceae</i>                                           | 20 - 30                                            | 42 - 53           | -                            |
|                        | Family <i>Mixed</i> in <i>Desulfobacterales</i>                          |                                                    | >50               | -                            |
| <b>Bin-genome DF1</b>  | Order <i>Desulfobacterales</i><br>and not Family <i>Desulfobulbaceae</i> | 26 - 35                                            | <45               | -                            |
| <b>Bin-genome DF2</b>  | Family <i>Desulfobacteraceae</i>                                         | 19 - 30                                            | 42 - 53           | -                            |
|                        | Family <i>Mixed</i> in <i>Desulfobacterales</i>                          | 20 - 30                                            | <50               | -                            |

<sup>a</sup> Relative frequency within the metagenome was calculated by read mapping of raw reads to contigs.

<sup>b</sup> Contigs assigned to phylum "*Mixed*", and also not assigned to kingdom *Virus*.

<sup>c</sup> Not applied for the contig grouping.



Supplementary TableS3. *Continued.*

Number of ORF annotated to specific KO within bin-genomes<sup>9</sup> 0 1 2 3 >4

| KO     | Genesymbol        | Description                                                  | Average peptide length ± SD | House keeping (%) | Single copied (%) | Bin-genome |                |                |      |                |                |     |                |                |     |                  |        |        |    |
|--------|-------------------|--------------------------------------------------------------|-----------------------------|-------------------|-------------------|------------|----------------|----------------|------|----------------|----------------|-----|----------------|----------------|-----|------------------|--------|--------|----|
|        |                   |                                                              |                             |                   |                   | Bac1       | Bac2           | Bet1           | Unc1 | Unc2           | DM1            | DB1 | DF1            | DB2            | DF2 | MS1 <sup>i</sup> | Ch1mix | DM2mix |    |
| K01870 | ileS              | isoleucyl-tRNA synthetase                                    | 983 ± 75                    | 98.2              | 97.3              | 1          | 1              | 1              | 1    | 0              | 2 <sup>h</sup> | 1   | 1              | 1              | 1   | 1                | 1      | 2      | 10 |
| K02601 | nusG              | transcription termination/antitermination factor NusG        | 193 ± 39                    | 97.6              | 97.5              | 1          | 1              | 0              | 0    | 1              | 1              | 1   | 1              | 1              | 1   | 1                | 1      | 2      | 2  |
| K06942 | yhfF              | GTP-binding protein YhfF                                     | 367 ± 10                    | 99.1              | 99.6              | 1          | 1              | 0              | 1    | 1              | 1              | 1   | 1              | 1              | 2   | 3                | 1      | 2      | 6  |
| K01887 | argS              | Arginyl-tRNA synthetase                                      | 571 ± 38                    | 97.4              | 95.4              | 1          | 1              | 1              | 1    | 1              | 0              | 1   | 1              | 1              | 0   | 1                | 1      | 2      | 4  |
| K03702 | uvrB              | excinuclease ABC, B subunit                                  | 687 ± 65                    | 96.7              | 99.4              | 1          | 2              | 1              | 1    | 1              | 3 <sup>h</sup> | 1   | 1              | 1              | 0   | 1                | 1      | 2      | 4  |
| K01876 | aspS              | aspartyl-tRNA synthetase                                     | 584 ± 28                    | 98.5              | 98.8              | 1          | 1              | 1              | 1    | 1              | 0              | 1   | 0              | 0              | 1   | 1                | 1      | 2      | 6  |
| K01872 | alaS              | Alanyl-tRNA synthetase                                       | 865 ± 80                    | 98.3              | 99.1              | 1          | 1              | 1              | 2    | 0              | 4              | 1   | 0              | 1              | 1   | 2                | 1      | 3      | 3  |
| K01892 | hisS              | histidyl-tRNA synthetase                                     | 434 ± 25                    | 98.4              | 96.8              | 1          | 1              | 3              | 1    | 4              | 0              | 1   | 0              | 1              | 1   | 1                | 1      | 2      | 5  |
| K01883 | cysS              | cysteinyl-tRNA synthetase                                    | 473 ± 39                    | 97.3              | 97.3              | 1          | 1              | 2              | 1    | 1              | 2 <sup>h</sup> | 2   | 2              | 1              | 2   | 1                | 1      | 2      | 4  |
| K02343 | dnaX              | DNA polymerase III, subunits gamma and tau                   | 614 ± 141                   | 97.5              | 95.3              | 1          | 1              | 1              | 1    | 4              | 0              | 2   | 3 <sup>h</sup> | 1              | 1   | 1                | 1      | 2      | 6  |
| K01937 | pyrG <sup>d</sup> | CTP synthase                                                 | 544 ± 15                    | 94.1              | 99.8              | 1          | 1              | 1              | 1    | 1              | 2              | 1   | 1              | 2              | 0   | 1                | 1      | 2      | 7  |
| K00927 | pgk <sup>d</sup>  | phosphoglycerate kinase                                      | 399 ± 15                    | 94.5              | 98.4              | 1          | 1              | 1              | 1    | 1              | 1              | 1   | 1              | 0              | 0   | 2                | 1      | 2      | 2  |
| K02834 | rfaA              | ribosome-binding factor A                                    | 133 ± 47                    | 97.0              | 99.9              | 1          | 1              | 1              | 1    | 1              | 1              | 1   | 1              | 1              | 1   | 1                | 0      | 2      | 5  |
| K02838 | frr <sup>d</sup>  | ribosome recycling factor                                    | 185 ± 5                     | 98.6              | 99.9              | 1          | 1              | 1              | 1    | 1              | 1              | 1   | 1              | 1              | 1   | 1                | 0      | 2      | 3  |
| K02357 | tsf <sup>d</sup>  | translation elongation factor Ts                             | 285 ± 36                    | 98.1              | 99.9              | 1          | 1              | 1              | 1    | 1              | 1              | 1   | 1              | 1              | 1   | 1                | 0      | 1      | 4  |
| K02835 | prfA              | peptide chain release factor 1                               | 358 ± 12                    | 97.9              | 99.8              | 1          | 1              | 1              | 1    | 1              | 3              | 1   | 1              | 1              | 1   | 1                | 0      | 3      | 4  |
| K03977 | engA              | ribosome-associated GTPase EngA                              | 467 ± 46                    | 97.3              | 99.8              | 1          | 1              | 1              | 1    | 1              | 1              | 1   | 1              | 1              | 1   | 1                | 0      | 5      | 4  |
| K04075 | tilS              | tRNA(Ile)-lysidine synthetase                                | 413 ± 61                    | 96.4              | 99.8              | 1          | 1              | 1              | 1    | 1              | 1              | 1   | 1              | 1              | 0   | 1                | 0      | 2      | 2  |
| K02519 | infB              | translation initiation factor IF-2                           | 865 ± 127                   | 98.5              | 99.6              | 1          | 1              | 2              | 1    | 1              | 2 <sup>h</sup> | 2   | 1              | 3 <sup>h</sup> | 1   | 1                | 0      | 2      | 6  |
| K03664 | smpB <sup>d</sup> | SmpB protein                                                 | 156 ± 10                    | 98.0              | 99.5              | 1          | 1              | 1              | 1    | 1              | 1              | 1   | 1              | 1              | 1   | 0                | 1      | 1      | 2  |
| K03596 | lepA              | GTP-binding protein LepA                                     | 604 ± 22                    | 98.4              | 99.4              | 1          | 1              | 2              | 1    | 1              | 1              | 1   | 1              | 1              | 1   | 1                | 0      | 2      | 6  |
| K03545 | tig               | trigger factor                                               | 445 ± 23                    | 97.9              | 99.4              | 1          | 1              | 1              | 1    | 0              | 1              | 2   | 2 <sup>h</sup> | 1              | 1   | 1                | 0      | 2      | 2  |
| K03438 | mraW              | MraW methylase family                                        | 318 ± 22                    | 98.5              | 99.3              | 1          | 1              | 1              | 1    | 1              | 1              | 1   | 1              | 1              | 1   | 1                | 0      | 2      | 3  |
| K03685 | rnc               | ribonuclease III                                             | 243 ± 42                    | 96.0              | 99.0              | 1          | 1              | 1              | 1    | 0              | 1              | 1   | 1              | 1              | 1   | 1                | 0      | 1      | 6  |
| K02520 | infC <sup>d</sup> | translation initiation factor IF-3                           | 176 ± 39                    | 96.4              | 98.7              | 1          | 1              | 1              | 1    | 1              | 1              | 1   | 1              | 1              | 1   | 1                | 0      | 2      | 2  |
| K03043 | rpoB <sup>d</sup> | DNA-directed RNA polymerase, beta subunit                    | 1274 ± 108                  | 95.5              | 99.5              | 1          | 1              | 1              | 0    | 2              | 3 <sup>h</sup> | 1   | 1              | 1              | 2   | 0                | 2      | 8      |    |
| K03046 | rpoC              | DNA-directed RNA polymerase, beta' or beta'' subunit         | 1335 ± 148                  | 96.5              | 97.4              | 1          | 1              | 1              | 0    | 2              | 4              | 1   | 2              | 1              | 3   | 0                | 2      | 12     |    |
| K02316 | dnaG <sup>d</sup> | DNA primase                                                  | 606 ± 57                    | 97.8              | 98.2              | 0          | 4              | 1              | 1    | 2              | 1              | 1   | 2              | 1              | 1   | 1                | 0      | 2      | 2  |
| K03553 | recA              | recA protein                                                 | 358 ± 61                    | 96.6              | 96.8              | 1          | 1              | 2              | 2    | 7              | 0              | 1   | 1              | 1              | 1   | 1                | 0      | 2      | 1  |
| K02963 | rpsR              | ribosomal protein S18                                        | 83 ± 11                     | 98.2              | 96.8              | 1          | 1              | 1              | 1    | 0              | 1              | 1   | 1              | 1              | 1   | 1                | 0      | 0      | 1  |
| K00942 | gmk               | guanylate kinase                                             | 207 ± 24                    | 95.7              | 96.6              | 1          | 1              | 1              | 1    | 1              | 1              | 1   | 1              | 1              | 1   | 1                | 0      | 2      | 6  |
| K02338 | dnaN              | DNA polymerase III, beta subunit                             | 375 ± 16                    | 98.3              | 94.7              | 1          | 1              | 1              | 1    | 2              | 1              | 1   | 1              | 1              | 2   | 0                | 3      | 2      |    |
| K02902 | rpmB              | ribosomal protein L28                                        | 75 ± 13                     | 96.1              | 94.4              | 0          | 1              | 1              | 1    | 1              | 1              | 1   | 1              | 0              | 0   | 0                | 1      | 4      | 4  |
| K02313 | dnaA              | chromosomal replication initiator protein DnaA               | 469 ± 54                    | 96.6              | 94.1              | 2          | 1              | 1              | 1    | 1              | 1              | 1   | 1              | 1              | 1   | 1                | 0      | 3      | 4  |
| K07042 | ybeY              | probable rRNA maturation factor                              | 164 ± 31                    | 93.8              | 99.9              | 1          | 1              | 1              | 1    | 1              | 1              | 1   | 1              | 0              | 1   | 1                | 0      | 2      | 1  |
| K03075 | secG              | preprotein translocase, SecG subunit                         | 105 ± 30                    | 95.2              | 99.8              | 1          | 1              | 0              | 0    | 0              | 1              | 1   | 1              | 1              | 0   | 2                | 0      | 1      | 1  |
| K00859 | coaE              | dephospho-CoA kinase                                         | 212 ± 42                    | 94.9              | 99.7              | 1          | 1              | 0              | 1    | 0              | 0              | 1   | 1              | 1              | 1   | 1                | 0      | 3      | 2  |
| K03073 | secE              | preprotein translocase, SecE subunit                         | 92 ± 32                     | 94.7              | 99.6              | 1          | 1              | 0              | 0    | 1              | 1              | 1   | 1              | 1              | 1   | 1                | 0      | 2      | 2  |
| K03595 | era               | GTP-binding protein Era                                      | 306 ± 19                    | 92.2              | 99.6              | 1          | 1              | 1              | 0    | 0              | 1              | 1   | 1              | 1              | 2   | 0                | 2      | 3      |    |
| K04043 | dnaK <sup>f</sup> | chaperone protein DnaK                                       | 629 ± 35                    | 97.9              | 91.6              | 1          | 2              | 4              | 1    | 2              | 5              | 1   | 2              | 1              | 4   | 1                | 5      | 8      |    |
| K02470 | gyrB <sup>f</sup> | DNA gyrase, B subunit                                        | 724 ± 94                    | 97.6              | 88.5              | 1          | 1              | 2              | 1    | 1              | 2              | 1   | 1              | 1              | 2   | 1                | 3      | 1      |    |
| K01972 | ligA <sup>f</sup> | DNA ligase, NAD-dependent                                    | 675 ± 80                    | 96.9              | 88.3              | 1          | 2 <sup>h</sup> | 1              | 1    | 2 <sup>h</sup> | 1              | 1   | 1              | 1              | 1   | 0                | 2      | 5      |    |
| K02469 | gyrA <sup>f</sup> | DNA gyrase, A subunit                                        | 852 ± 82                    | 97.6              | 86.6              | 0          | 1              | 1              | 1    | 2              | 2              | 1   | 1              | 1              | 1   | 1                | 4      | 8      |    |
| K03070 | secA <sup>f</sup> | preprotein translocase, SecA subunit                         | 889 ± 79                    | 99.2              | 86.1              | 1          | 1              | 1              | 3    | 1              | 2 <sup>h</sup> | 1   | 1              | 1              | 1   | 1                | 0      | 2      | 5  |
| K02911 | rpmF <sup>f</sup> | ribosomal protein L32                                        | 59 ± 7                      | 93.5              | 96.6              | 0          | 0              | 1              | 0    | 1              | 1              | 0   | 1              | 0              | 0   | 0                | 2      | 1      |    |
| K00566 | mnmA <sup>f</sup> | tRNA (5-methylaminomethyl-2-thiouridylate)-methyltransferase | 370 ± 25                    | 95.0              | 93.7              | 1          | 1              | 2              | 1    | 1              | 3 <sup>h</sup> | 1   | 1              | 1              | 1   | 1                | 0      | 2      | 3  |
| K02914 | rpmH <sup>f</sup> | ribosomal protein L34                                        | 46 ± 4                      | 88.2              | 99.9              | 0          | 0              | 0              | 1    | 0              | 0              | 0   | 0              | 0              | 0   | 0                | 1      | 2      |    |
| K01879 | glyS <sup>f</sup> | glycyl-tRNA synthetase beta chain                            | 693 ± 32                    | 64.6              | 100.0             | 0          | 0              | 2 <sup>h</sup> | 0    | 0              | 3              | 1   | 1              | 0              | 0   | 0                | 0      | 6      |    |
| K01869 | leuS <sup>f</sup> | leucyl-tRNA synthetase                                       | 859 ± 61                    | 47.4              | 26.6              | 1          | 1              | 1              | 2    | 1              | 1              | 1   | 1              | 1              | 1   | 1                | 2      | 10     |    |

<sup>a</sup> Bacterial genomes having the housekeeping gene / Total 1943 KEGG organisms (in Nov, 2012) × 100 (%). Red colored, <95%; Orange colored, <97%.

<sup>b</sup> Bacterial genomes having the housekeeping gene with single copy / Total bacterial genomes having the housekeeping gene × 100 (%). Red colored, <95%; Orange colored, <97%.

<sup>c</sup> Sixteen single-copied housekeeping genes (eight for ribosomal proteins) used for core gene-based microbial community analysis.

<sup>d</sup> Thirty protein encoding phylogenetic marker genes used for AMPHORA program (Wu et al. 2008). The column yellow-highlighted.

<sup>e</sup> Three single-copied housekeeping genes (rplE, nusA, and pheS) used for phylogenetic tree analysis.

<sup>f</sup> Ten single-copied housekeeping genes were not used for draft genome completeness estimation because of their low qualities.

<sup>g</sup> Column was colored depend on number of ORF annotated to specific KO within each bin-genome. White column was counted for draft genome completeness.

<sup>h</sup> Column showed multi-copied partial ORFs annotated to same KO, and the sum of the peptide length was similar to averaged peptide length, which treated as single copy existence.

<sup>i</sup> Blue letter with orange highlighted column indicates genes that are not conserved in 133 *Archaea* genomes (in Nov, 2012).

Supplementary Table S4. Single copied gene list for validation of draft genome assembly within domain *Archaea*<sup>a</sup>

| KO     | KO discription                                                    | Bin-genome MS1 | <i>Methanosalsum zhilinae</i> | <i>Methanococcoides burtonii</i> |
|--------|-------------------------------------------------------------------|----------------|-------------------------------|----------------------------------|
| K00096 | glycerol-1-phosphate dehydrogenase [NAD(P)] [EC:1.1.1.261]        | 1              | 1                             | 1                                |
| K00555 | tRNA (guanine-N2-)-methyltransferase [EC:2.1.1.32]                | 1              | 1                             | 1                                |
| K00586 | diphthine synthase [EC:2.1.1.98]                                  | 1              | 1                             | 1                                |
| K00609 | aspartate carbamoyltransferase catalytic subunit [EC:2.1.3.2]     | 1              | 1                             | 1                                |
| K00611 | ornithine carbamoyltransferase [EC:2.1.3.3]                       | 1              | 1                             | 1                                |
| K00946 | thiamine-monophosphate kinase [EC:2.7.4.16]                       | 1              | 1                             | 1                                |
| K01251 | adenosylhomocysteinase [EC:3.3.1.1]                               | 1              | 1                             | 1                                |
| K01265 | methionyl aminopeptidase [EC:3.4.11.18]                           | 1              | 1                             | 1                                |
| K01591 | orotidine-5'-phosphate decarboxylase [EC:4.1.1.23]                | 1              | 1                             | 1                                |
| K01803 | triosephosphate isomerase (TIM) [EC:5.3.1.1]                      | 1              | 1                             | 1                                |
| K01807 | ribose 5-phosphate isomerase A [EC:5.3.1.6]                       | 1              | 1                             | 1                                |
| K01868 | threonyl-tRNA synthetase [EC:6.1.1.3]                             | 1              | 1                             | 1                                |
| K01870 | isoleucyl-tRNA synthetase [EC:6.1.1.5]                            | 1              | 1                             | 1                                |
| K01872 | alanyl-tRNA synthetase [EC:6.1.1.7]                               | 2              | 1                             | 1                                |
| K01873 | valyl-tRNA synthetase [EC:6.1.1.9]                                | 1              | 1                             | 1                                |
| K01874 | methionyl-tRNA synthetase [EC:6.1.1.10]                           | 1              | 1                             | 1                                |
| K01876 | aspartyl-tRNA synthetase [EC:6.1.1.12]                            | 1              | 1                             | 1                                |
| K01880 | glycyl-tRNA synthetase [EC:6.1.1.14]                              | 1              | 1                             | 1                                |
| K01881 | prolyl-tRNA synthetase [EC:6.1.1.15]                              | 1              | 1                             | 1                                |
| K01885 | glutamyl-tRNA synthetase [EC:6.1.1.17]                            | 1              | 1                             | 1                                |
| K01887 | arginyl-tRNA synthetase [EC:6.1.1.19]                             | 1              | 1                             | 1                                |
| K01889 | phenylalanyl-tRNA synthetase alpha chain [EC:6.1.1.20]            | 1              | 1                             | 1                                |
| K01890 | phenylalanyl-tRNA synthetase beta chain [EC:6.1.1.20]             | 1              | 1                             | 1                                |
| K01892 | histidyl-tRNA synthetase [EC:6.1.1.21]                            | 1              | 1                             | 1                                |
| K01937 | CTP synthase [EC:6.3.4.2]                                         | 1              | 1                             | 1                                |
| K01975 | 2'-5' RNA ligase [EC:6.5.1.-]                                     | 0 <sup>b</sup> | 1                             | 1                                |
| K02117 | V-type H <sup>+</sup> transporting ATPase subunit A [EC:3.6.3.14] | 1              | 1                             | 1                                |
| K02118 | V-type H <sup>+</sup> transporting ATPase subunit B [EC:3.6.3.14] | 1              | 1                             | 1                                |
| K02528 | 16S rRNA -dimethyltransferase [EC:2.1.1.182]                      | 1              | 1                             | 1                                |
| K02601 | transcriptional antiterminator NusG                               | 1              | 1                             | 1                                |
| K02683 | DNA primase [EC:2.7.7.-]                                          | 1              | 1                             | 1                                |
| K02863 | large subunit ribosomal protein L1                                | 1              | 1                             | 1                                |
| K02864 | large subunit ribosomal protein L10                               | 1              | 1                             | 1                                |
| K02866 | large subunit ribosomal protein L10e                              | 1              | 1                             | 1                                |
| K02867 | large subunit ribosomal protein L11                               | 1              | 1                             | 1                                |
| K02869 | large subunit ribosomal protein L12                               | 1              | 1                             | 1                                |
| K02871 | large subunit ribosomal protein L13                               | 1              | 1                             | 1                                |
| K02874 | large subunit ribosomal protein L14                               | 1              | 1                             | 1                                |
| K02876 | large subunit ribosomal protein L15                               | 1              | 1                             | 1                                |
| K02877 | large subunit ribosomal protein L15e                              | 1              | 1                             | 1                                |
| K02881 | large subunit ribosomal protein L18                               | 1              | 1                             | 1                                |
| K02883 | large subunit ribosomal protein L18e                              | 1              | 1                             | 1                                |
| K02885 | large subunit ribosomal protein L19e                              | 1              | 1                             | 1                                |
| K02886 | large subunit ribosomal protein L2                                | 1              | 1                             | 1                                |
| K02889 | large subunit ribosomal protein L21e                              | 1              | 1                             | 1                                |
| K02890 | large subunit ribosomal protein L22                               | 0 <sup>b</sup> | 1                             | 1                                |
| K02895 | large subunit ribosomal protein L24                               | 1              | 1                             | 1                                |
| K02896 | large subunit ribosomal protein L24e                              | 1              | 1                             | 1                                |
| K02906 | large subunit ribosomal protein L3                                | 1              | 1                             | 1                                |
| K02907 | large subunit ribosomal protein L30                               | 1              | 1                             | 1                                |
| K02910 | large subunit ribosomal protein L31e                              | 1              | 1                             | 1                                |
| K02912 | large subunit ribosomal protein L32e                              | 1              | 1                             | 1                                |
| K02921 | large subunit ribosomal protein L37Ae                             | 1              | 1                             | 1                                |
| K02927 | large subunit ribosomal protein L40e                              | 0 <sup>b</sup> | 1                             | 1                                |
| K02929 | large subunit ribosomal protein L44e                              | 0 <sup>b</sup> | 1                             | 1                                |
| K02930 | large subunit ribosomal protein L4e                               | 1              | 1                             | 1                                |
| K02931 | large subunit ribosomal protein L5                                | 1              | 1                             | 1                                |
| K02933 | large subunit ribosomal protein L6                                | 1              | 1                             | 1                                |
| K02936 | large subunit ribosomal protein L7Ae                              | 1              | 1                             | 1                                |
| K02946 | small subunit ribosomal protein S10                               | 1              | 1                             | 1                                |
| K02948 | small subunit ribosomal protein S11                               | 1              | 1                             | 1                                |
| K02950 | small subunit ribosomal protein S12                               | 1              | 1                             | 1                                |
| K02952 | small subunit ribosomal protein S13                               | 1              | 0                             | 1                                |
| K02956 | small subunit ribosomal protein S15                               | 1              | 1                             | 1                                |
| K02961 | small subunit ribosomal protein S17                               | 1              | 1                             | 1                                |
| K02965 | small subunit ribosomal protein S19                               | 1              | 1                             | 1                                |
| K02966 | small subunit ribosomal protein S19e                              | 1              | 1                             | 1                                |
| K02967 | small subunit ribosomal protein S2                                | 1              | 1                             | 1                                |
| K02974 | small subunit ribosomal protein S24e                              | 1              | 1                             | 1                                |
| K02978 | small subunit ribosomal protein S27e                              | 0 <sup>b</sup> | 1                             | 1                                |



Supplementary Table S4. *Continued.*

| KO     | KO discription                                                | Bin-genome<br>MS1 | <i>Methanosalsum<br/>zhilinae</i> | <i>Methanococcoides<br/>burtonii</i> |
|--------|---------------------------------------------------------------|-------------------|-----------------------------------|--------------------------------------|
| K02979 | small subunit ribosomal protein S28e                          | 1                 | 1                                 | 1                                    |
| K02982 | small subunit ribosomal protein S3                            | 1                 | 1                                 | 1                                    |
| K02984 | small subunit ribosomal protein S3Ae                          | 1                 | 1                                 | 1                                    |
| K02986 | small subunit ribosomal protein S4                            | 1                 | 1                                 | 1                                    |
| K02987 | small subunit ribosomal protein S4e                           | 1                 | 1                                 | 1                                    |
| K02988 | small subunit ribosomal protein S5                            | 1                 | 1                                 | 1                                    |
| K02991 | small subunit ribosomal protein S6e                           | 1                 | 1                                 | 1                                    |
| K02992 | small subunit ribosomal protein S7                            | 1                 | 1                                 | 1                                    |
| K02994 | small subunit ribosomal protein S8                            | 1                 | 1                                 | 1                                    |
| K02995 | small subunit ribosomal protein S8e                           | 1                 | 1                                 | 1                                    |
| K02996 | small subunit ribosomal protein S9                            | 1                 | 1                                 | 1                                    |
| K03041 | DNA-directed RNA polymerase subunit A' [EC:2.7.7.6]           | 1                 | 1                                 | 1                                    |
| K03042 | DNA-directed RNA polymerase subunit A" [EC:2.7.7.6]           | 1                 | 1                                 | 1                                    |
| K03047 | DNA-directed RNA polymerase subunit D [EC:2.7.7.6]            | 1                 | 1                                 | 1                                    |
| K03049 | DNA-directed RNA polymerase subunit E' [EC:2.7.7.6]           | 1                 | 1                                 | 1                                    |
| K03050 | DNA-directed RNA polymerase subunit E" [EC:2.7.7.6]           | 0 <sup>b</sup>    | 1                                 | 1                                    |
| K03053 | DNA-directed RNA polymerase subunit H [EC:2.7.7.6]            | 1                 | 1                                 | 1                                    |
| K03055 | DNA-directed RNA polymerase subunit K [EC:2.7.7.6]            | 0 <sup>b</sup>    | 1                                 | 1                                    |
| K03056 | DNA-directed RNA polymerase subunit L [EC:2.7.7.6]            | 1                 | 1                                 | 1                                    |
| K03058 | DNA-directed RNA polymerase subunit N [EC:2.7.7.6]            | 0 <sup>b</sup>    | 1                                 | 1                                    |
| K03076 | preprotein translocase subunit SecY                           | 1                 | 1                                 | 1                                    |
| K03106 | signal recognition particle subunit SRP54                     | 1                 | 1                                 | 1                                    |
| K03110 | fused signal recognition particle receptor                    | 1                 | 1                                 | 1                                    |
| K03232 | elongation factor 1-beta                                      | 0 <sup>b</sup>    | 1                                 | 0                                    |
| K03234 | elongation factor 2                                           | 1                 | 1                                 | 1                                    |
| K03237 | translation initiation factor 2 subunit 1                     | 1                 | 1                                 | 1                                    |
| K03242 | translation initiation factor 2 subunit 3                     | 1                 | 1                                 | 1                                    |
| K03243 | translation initiation factor 5B                              | 1                 | 1                                 | 1                                    |
| K03263 | translation initiation factor 5A                              | 1                 | 1                                 | 1                                    |
| K03264 | translation initiation factor 6                               | 1                 | 1                                 | 1                                    |
| K03265 | peptide chain release factor subunit 1                        | 1                 | 1                                 | 1                                    |
| K03330 | glutamyl-tRNA(Gln) amidotransferase subunit E [EC:6.3.5.7]    | 1                 | 1                                 | 1                                    |
| K03470 | ribonuclease HII [EC:3.1.26.4]                                | 1                 | 1                                 | 1                                    |
| K03626 | nascent polypeptide-associated complex subunit alpha          | 1                 | 1                                 | 1                                    |
| K03627 | putative transcription factor                                 | 1                 | 1                                 | 1                                    |
| K04483 | DNA repair protein RadA                                       | 1                 | 1                                 | 1                                    |
| K04794 | peptidyl-tRNA hydrolase, PTH2 family [EC:3.1.1.29]            | 1                 | 1                                 | 1                                    |
| K04795 | fibrillar-like pre-rRNA processing protein                    | 0 <sup>b</sup>    | 1                                 | 1                                    |
| K04798 | prefoldin beta subunit                                        | 1                 | 1                                 | 1                                    |
| K04799 | flap endonuclease-1 [EC:3.-.-.]                               | 1                 | 1                                 | 1                                    |
| K04800 | replication factor C large subunit                            | 1                 | 1                                 | 1                                    |
| K06174 | ATP-binding cassette, sub-family E, member 1                  | 1                 | 1                                 | 1                                    |
| K06865 | ATPase                                                        | 1                 | 1                                 | 1                                    |
| K06875 | programmed cell death protein 5                               | 1                 | 1                                 | 1                                    |
| K06943 | nucleolar GTP-binding protein                                 | 0 <sup>b</sup>    | 1                                 | 1                                    |
| K06944 | Predicted GTPase                                              | 0 <sup>b</sup>    | 1                                 | 1                                    |
| K06961 | ribosomal RNA assembly protein                                | 1                 | 1                                 | 1                                    |
| K06965 | protein pelota                                                | 1                 | 1                                 | 1                                    |
| K07041 | Predicted metal-dependent Rnase                               | 1                 | 1                                 | 1                                    |
| K07060 | UPF0271 protein                                               | 1                 | 1                                 | 1                                    |
| K07178 | RIO kinase 1 [EC:2.7.11.1]                                    | 1                 | 1                                 | 1                                    |
| K07558 | tRNA nucleotidyltransferase (CCA-adding enzyme) [EC:2.7.7.72] | 1                 | 1                                 | 1                                    |
| K07561 | diphthamide synthase subunit DPH2                             | 1                 | 1                                 | 1                                    |
| K07566 | tRNA threonylcarbamoyladenosine biosynthesis protein          | 1                 | 1                                 | 1                                    |
| K07572 | putative nucleotide binding protein                           | 1                 | 1                                 | 1                                    |
| K07575 | PUA domain protein                                            | 1                 | 0                                 | 1                                    |
| K07580 | hypothetical protein                                          | 0 <sup>b</sup>    | 1                                 | 1                                    |
| K07583 | tRNA pseudouridine synthase 10 [EC:5.4.99.-]                  | 2                 | 1                                 | 1                                    |
| K07732 | riboflavin kinase, archaea type [EC:2.7.1.161]                | 1                 | 1                                 | 1                                    |
| K09141 | hypothetical protein                                          | 1                 | 1                                 | 1                                    |
| K09482 | glutamyl-tRNA(Gln) amidotransferase subunit D [EC:6.3.5.7]    | 1                 | 1                                 | 1                                    |
| K09735 | hypothetical protein                                          | 1                 | 1                                 | 1                                    |
| K09903 | uridylyl transferase [EC:2.7.4.22]                            | 1                 | 1                                 | 1                                    |
| K11130 | H/ACA ribonucleoprotein complex subunit 3                     | 0 <sup>b</sup>    | 1                                 | 1                                    |
| K14415 | tRNA-splicing ligase RtcB [EC:6.5.1.3]                        | 1                 | 1                                 | 1                                    |
| K14574 | ribosome maturation protein SDO1                              | 1                 | 1                                 | 1                                    |

<sup>a</sup> Values indicate numbers of ORFs annotated to KO of Archaeal housekeeping genes.

<sup>b</sup> Orange column means missing gene to estimate draft genome completeness

Supplementary Table S5. Summary of Bin-genomes clustered from metagenomic assembly.

| Bin-genome ID | Length    | Contigs (=scaffold) <sup>b</sup> | Longest contig | HMP draft genome criteria <sup>a</sup> |                         |                                     |                                               |                             |                                    | Genome status |                          |
|---------------|-----------|----------------------------------|----------------|----------------------------------------|-------------------------|-------------------------------------|-----------------------------------------------|-----------------------------|------------------------------------|---------------|--------------------------|
|               |           |                                  |                | (1) >90% Criteria for pass             | (2) >5.0 Ave Contig Cov | (3) >5 kb Contig N N50 <sup>b</sup> | (4) >20 kb Contig (Scaffold) N50 <sup>b</sup> | (5) >5 kb Ave Contig Length | (6) >90% completeness <sup>c</sup> |               |                          |
| DB1           | 3,511,546 | 79                               | 170,436        | 100                                    | 81.3                    | 61,819                              | 87,111                                        | 44,450                      | 95                                 | 6/6           | High-quality draft [HQD] |
| DB2           | 2,487,597 | 114                              | 91,763         | 100                                    | 23.0                    | 23,717                              | 40,483                                        | 21,821                      | 93                                 | 6/6           | High-quality draft [HQD] |
| DF1           | 3,522,993 | 166                              | 168,890        | 100                                    | 29.7                    | 22,242                              | 49,879                                        | 21,223                      | 90                                 | 6/6           | High-quality draft [HQD] |
| DF2           | 3,350,215 | 262                              | 84,666         | 100                                    | 22.5                    | 15,453                              | 19,991                                        | 12,787                      | 78                                 | 4/6           | Standard draft [SD]      |
| DM1           | 2,861,175 | 908                              | 40,180         | 100                                    | 25.6                    | 4,102                               | 4,662                                         | 3,151                       | 84                                 | 1/6           | Standard draft [SD]      |
| Bet1          | 2,589,546 | 487                              | 41,557         | 100                                    | 31.9                    | 7,221                               | 8,781                                         | 5,317                       | 87                                 | 3/6           | Standard draft [SD]      |
| Bac1          | 2,978,359 | 86                               | 163,566        | 100                                    | 37.8                    | 51,788                              | 73,194                                        | 34,632                      | 96                                 | 6/6           | High-quality draft [HQD] |
| Bac2          | 4,592,223 | 218                              | 196,280        | 100                                    | 21.3                    | 33,443                              | 48,979                                        | 21,065                      | 96                                 | 6/6           | High-quality draft [HQD] |
| Unc1          | 3,600,550 | 58                               | 258,628        | 100                                    | 31.5                    | 44,269                              | 111,785                                       | 62,078                      | 80                                 | 5/6           | Standard draft [SD]      |
| Unc2          | 2,534,126 | 73                               | 280,490        | 100                                    | 26.4                    | 51,096                              | 60,663                                        | 34,714                      | 82                                 | 5/6           | Standard draft [SD]      |
| MS1           | 2,212,198 | 171                              | 61,973         | 100                                    | 257.6                   | 20,458                              | 25,353                                        | 12,937                      | 90                                 | 6/6           | High-quality draft [HQD] |
| DM2mix        | 7,729,897 | 3843                             | 39,649         | 100                                    | 13.5                    | na                                  | 2,823                                         | 2,011                       | 347 <sup>d</sup>                   | 2/5           | Mixed <sup>d</sup>       |
| Ch11mix       | 3,881,265 | 302                              | 149,429        | 100                                    | 24.8                    | na                                  | 20,405                                        | 12,852                      | 190 <sup>d</sup>                   | 4/5           | Mixed <sup>d</sup>       |

<sup>a</sup> The draft genome quality was validated by using criteria described HMP Microbial Reference Genome work (The Human Microbiome Jumpstart Reference Strains Consortium, Science 328:994-999).

<sup>b</sup> In this study, contigs were scaffold with N by CLC de novo assembly cell. Thereby, for criteria (3), scaffolds were separated to contigs at N region.

<sup>c</sup> Values were calculated from frequency of KO assignment to universal single-copied gene family lists (Supplementary Table S4 and S5).

<sup>d</sup> Ch11mix was considered as mixture of two genomes, while DM2mix was considered as mixture of over three genomes.

Supplementary Table S6. Bin-genome linkage to highly abundant phylotypes (>1%) observed in 16S rRNA clone analysis.

| 16S clone analysis           |              | Bin-genome linkage         |            | 16S in metagenome <sup>e</sup> |                | Phylum (Class)        | Family                            | % match | Closest strain                               | Accession no. |
|------------------------------|--------------|----------------------------|------------|--------------------------------|----------------|-----------------------|-----------------------------------|---------|----------------------------------------------|---------------|
| Clone ID                     | No. of clone | Bin-genome ID <sup>b</sup> | Cov. range | Length of contig               | Cov. of contig |                       |                                   |         |                                              |               |
| <b>Domain Bacteria</b>       |              |                            |            |                                |                |                       |                                   |         |                                              |               |
| Wcon1_M01                    | 8            | DF2                        | 20-30      | 37503                          | 21.9           | Deltaproteobacteria   | Desulfobacteraceae                | 99      | <i>Desulfobacter postgatei</i> DSM 2034      | AF418180      |
| Wcon1_M03                    | 7            | DF1 <sup>a</sup>           | 26-35      | -                              | -              | Deltaproteobacteria   | Desulfobacteraceae                | 96      | <i>Desulfococcus biacutus</i> DSM 5651       | AJ277887      |
| Wcon1_M09                    | 3            | -                          | -          | 7910                           | 20.5           | Deltaproteobacteria   | Desulfobacteraceae                | 94      | <i>Desulfonema magnum</i>                    | U45989        |
| Wcon1_I05                    | 26           | DB1                        | 70-90      | 44551                          | 99.7           | Deltaproteobacteria   | Desulfobulbaceae                  | 91      | <i>Desulfobulbus rhabdiformis</i> Mic5c02    | AB546248      |
| Wcon1_C21                    | 11           | DB2                        | 20-30      | 802                            | 204.6          | Deltaproteobacteria   | Desulfobulbaceae                  | 98      | <i>Desulfobacterium catecholicum</i>         | EF442982      |
| Wcon2_A24                    | 6            | DM1 <sup>a</sup>           | 20-50      | -                              | -              | Deltaproteobacteria   | Desulfuromonadaceae               | 99      | <i>Desulfuromonas acetexigens</i>            | U23140        |
| Wcon1_O21                    | 4            | DM2mix <sup>a</sup>        | 10-20      | -                              | -              | Deltaproteobacteria   | Geobacteraceae                    | 98      | <i>Geobacter hephaestius</i>                 | AY737507      |
| Wcon1_M21                    | 5            | -                          | -          | -                              | -              | Deltaproteobacteria   | Syntrophobacteraceae              | 95      | <i>Syntrophobacter wolinii</i>               | U49429        |
| Wcon1_K23                    | 10           | Bet1                       | 23-50      | 1128                           | 221.2          | Betaproteobacteria    | Rhodocyclaceae                    | 96      | <i>Denitratisona oestradiolicum</i> AcBE2-1  | NR_043249     |
| Wcon1_I01                    | 3            | -                          | -          | -                              | -              | Betaproteobacteria    | Hydrogenophilaceae                | 98      | <i>Thiobacillus thioparus</i> THI 115        | HM535225      |
| Wcon1_G05                    | 5            | -                          | -          | 919                            | 33.8           | Epsilonproteobacteria | Campylobacteriales                | 100     | <i>Arcobacter cryaerophilus</i>              | U34387        |
| Wcon1_C05                    | 10           | -                          | -          | -                              | -              | Clostridia            | Peptostreptococaceae <sup>a</sup> | 98      | <i>Clostridium maritimum</i> G12             | EU089965      |
| Wcon1_G17                    | 3            | -                          | -          | 673                            | 63.6           | Spirochaetes          | -                                 | 95      | <i>Spirochaetes bacterium</i> SA-10          | AY695841      |
| Wcon2_K14                    | 1            | Bac2                       | 18-26      | 23828                          | 20.3           | Bacteroidetes         | -                                 | 91      | <i>Bacteroidetes bacterium</i> 4F6B          | AB623230      |
| Wcon1_O17                    | 7            | Chl1mix <sup>a</sup>       | 20-32      | -                              | -              | Chloroflexi           | Anaerolineae                      | 97      | <i>Bacterium</i> JN18_A7_F                   | DQ168648      |
| Wcon1_O19                    | 6            | Unc1                       | 28-40      | 66003                          | 29.7           | Unclassified          | -                                 | 83      | <i>Moorella thermoacetica</i> ATCC 39073     | CP000232      |
| Wcon1_K03                    | 5            | Chl1mix                    | 20-32      | 16203                          | 22.7           | Unclassified          | -                                 | 87      | <i>Bacterium</i> Ellin 513                   | AY960776      |
| Wcon1_G13                    | 3            | -                          | -          | 585                            | 46.5           | Unclassified          | -                                 | 87      | <i>Candidatus Isobeggiatoa divolgata</i>     | FN561862      |
| Wcon2_A06                    | 6            | -                          | -          | 4753                           | 68.1           | Unclassified          | -                                 | 84      | <i>Deltaproteobacterium</i> BABL1            | GQ495224      |
| Two-copy clones <sup>c</sup> | 28           |                            |            |                                |                |                       |                                   |         | - 14 phylotypes observed                     |               |
| Single clones <sup>d</sup>   | 102          |                            |            |                                |                |                       |                                   |         | - 103 phylotypes observed (except Wcon2_K14) |               |
| SUM                          | 259          |                            |            |                                |                |                       |                                   |         |                                              |               |
| <b>Domain Archaea</b>        |              |                            |            |                                |                |                       |                                   |         |                                              |               |
| wMFCa_M03                    | 83           | MS1                        | 200-500    | 8364                           | 448.1          | Euryarchaeota         | Methanosarcinaceae                | 99      | <i>Methanomethylovorans hollandica</i>       | NR_102454     |
| SUM                          | 83           |                            |            |                                |                |                       |                                   |         |                                              |               |

<sup>a</sup> Bin-genome linkage was estimated by comparison of phylogenetic positions between 16S rRNA and three housekeeping proteins (NusA, PheS, and RplE) (Supplementary Fig. S2-S5).

<sup>b</sup> Bin-genome Bac1 and Unc2 were not linked to their detailed phylogenetic positions from these comparison analyses.

<sup>c</sup> Total 14 different phylotypes were observed with two clones in 259 clones.

<sup>d</sup> Total 103 different phylotypes were observed with single clones in 259 clones.

<sup>e</sup> JCVI MG-pipeline extracted 16S rRNA region from the assembled contigs. The length and average coverage of the contigs involving the 16S rRNA region were shown.

Supplementary Table S7. Summary of Bin-genomes clustered from metagenomic assembly.

| Taxonomy of contigs<br>Bin-genome ID | Core gene-basis<br>frequency (%) <sup>a</sup> | Length<br>(Mbp) | Number<br>of<br>contigs | Numbers<br>of<br>gene/ORF <sup>b</sup> | KO-<br>assigned<br>ORFs | Number of c-<br>type<br>cytochromes <sup>c</sup> | Raw reads<br>mapped <sup>d</sup> | Raw reads<br>frequency<br>(%) <sup>d</sup> |
|--------------------------------------|-----------------------------------------------|-----------------|-------------------------|----------------------------------------|-------------------------|--------------------------------------------------|----------------------------------|--------------------------------------------|
| <i>Desulfobulbaceae</i>              | <b>0.1 ± 0.3</b>                              | 0.82            | 708                     | 1338                                   | 634                     | 18 (12)                                          | 121,266                          | 0.2                                        |
| Bin-genome DB1                       | <b>7.2 ± 0.7</b>                              | 3.51            | 79                      | 3188                                   | 1607                    | 92 (46)                                          | 3,105,519                        | 6.2                                        |
| Bin-genome DB2                       | <b>1.8 ± 0.3</b>                              | 2.49            | 114                     | 2217                                   | 1281                    | 24 (8)                                           | 603,250                          | 1.2                                        |
| <i>Desulfobacteraceae</i>            | <b>4.0 ± 1.0</b>                              | 12.96           | 8496                    | 19016                                  | 8831                    | 132 (51)                                         | 1,864,146                        | 3.7                                        |
| Bin-genome DF1                       | <b>2.7 ± 0.5</b>                              | 3.52            | 166                     | 3272                                   | 1710                    | 37 (18)                                          | 1,186,533                        | 2.4                                        |
| Bin-genome DF2                       | <b>1.5 ± 0.5</b>                              | 3.35            | 262                     | 2967                                   | 1611                    | 27 (10)                                          | 807,030                          | 1.6                                        |
| <i>Desulfuromonadales</i>            |                                               |                 |                         |                                        |                         |                                                  |                                  |                                            |
| DM2mix                               | <b>2.9 ± 0.7</b>                              | 7.73            | 3843                    | 10512                                  | 5427                    | 138 (76)                                         | 1,206,183                        | 2.4                                        |
| Bin-genomeDM1                        | <b>2.4 ± 0.6</b>                              | 2.86            | 908                     | 3361                                   | 1797                    | 77 (54)                                          | 852,428                          | 1.7                                        |
| <i>Syntrophobacterales</i>           | <b>3.4 ± 1.3</b>                              | 8.30            | 6483                    | 12807                                  | 6957                    | 73 (24)                                          | 1,290,512                        | 2.6                                        |
| Other <i>Deltaproteobact</i>         | <b>1.4 ± 1.0</b>                              | 16.80           | 10460                   | 24346                                  | 10301                   | 234 (98)                                         | 2,852,956                        | 5.7                                        |
| <i>Betaproteobacteria</i>            | <b>2.8 ± 0.9</b>                              | 9.41            | 6524                    | 14993                                  | 6345                    | 109 (26)                                         | 1,491,950                        | 3.0                                        |
| Bin-genome Bet1                      | <b>3.3 ± 0.5</b>                              | 2.59            | 487                     | 3020                                   | 1771                    | 62 (17)                                          | 1,051,762                        | 2.1                                        |
| <i>Gammaproteobacteria</i>           | <b>0.3 ± 0.4</b>                              | 8.60            | 7081                    | 13570                                  | 4588                    | 81 (19)                                          | 1,319,582                        | 2.6                                        |
| <i>Alphaproteobacteria</i>           | <b>0.3 ± 0.3</b>                              | 4.84            | 4325                    | 7967                                   | 2949                    | 26 (9)                                           | 634,864                          | 1.3                                        |
| Other <i>Proteobacteria</i>          | <b>0.7 ± 0.9</b>                              | 6.47            | 1017                    | 7555                                   | 2421                    | 53 (16)                                          | 2,048,828                        | 4.1                                        |
| <i>Bacteroidetes</i>                 | <b>3.0 ± 1.0</b>                              | 17.03           | 13885                   | 24523                                  | 10062                   | 76 (17)                                          | 1,689,278                        | 3.4                                        |
| Bin-genome Bac1                      | <b>3.1 ± 0.3</b>                              | 2.98            | 86                      | 2514                                   | 1278                    | 14 (5)                                           | 1,199,373                        | 2.4                                        |
| Bin-genome Bac2                      | <b>1.7 ± 0.2</b>                              | 4.59            | 218                     | 3748                                   | 1620                    | 39 (11)                                          | 1,031,135                        | 2.1                                        |
| <i>Chloroflexi</i>                   | <b>0.6 ± 0.6</b>                              | 3.74            | 3533                    | 6112                                   | 2801                    | 18 (2)                                           | 447,061                          | 0.9                                        |
| Chl1mix                              | <b>3.9 ± 1.1</b>                              | 3.88            | 302                     | 3715                                   | 1935                    | 19 (1)                                           | 1,047,413                        | 2.1                                        |
| <i>Firmicutes</i>                    | <b>9.6 ± 2.8</b>                              | 21.08           | 16991                   | 33792                                  | 16969                   | 128 (19)                                         | 2,639,034                        | 5.3                                        |
| Phylum <i>Mixed</i> <sup>e</sup>     | <b>5.3 ± 2.6</b>                              | 14.05           | 5216                    | 17683                                  | 8025                    | 95 (22)                                          | 2,719,207                        | 5.5                                        |
| Bin-genome Unc1                      | <b>2.7 ± 1.1</b>                              | 3.60            | 58                      | 3081                                   | 1559                    | 50 (26)                                          | 1,270,440                        | 2.5                                        |
| Bin-genome Unc2                      | <b>2.2 ± 0.9</b>                              | 2.53            | 73                      | 2634                                   | 806                     | 17 (0)                                           | 680,490                          | 1.4                                        |
| <i>Euryarchaeota</i>                 | <b>1.2 ± 2.3</b>                              | 7.71            | 5800                    | 11094                                  | 4485                    | 42 (5)                                           | 1,944,592                        | 3.9                                        |
| Bin-genome MS1                       | <b>22.7 ± 2.5</b>                             | 2.21            | 171                     | 2155                                   | 1204                    | 10 (2)                                           | 5,683,384                        | 11.4                                       |
| Other Phyla                          | <b>9.2 ± 1.9</b>                              | 70.78           | 72454                   | 118711                                 | 27683                   | 345 (120)                                        | 9,048,985                        | 18.2                                       |
| Total                                | 100                                           | 248.5           | 169740                  | 359891                                 | 136657                  | 2036 (714)                                       | 49,837,201                       | 100                                        |

<sup>a</sup> Averaged frequency within the metagenome was calculated based on the coverage of 13 universal single-copied core genes (Mean ± SD).

<sup>b</sup> Numbers of ORFs have potential errors in metagenomic ORF calling because of incomplete assemblies.

<sup>c</sup> Number of ORFs assigned as c-type cytochrome by CXXCH domain search. Numbers of multi-heme c-type cytochromes are described in parentheses.

<sup>d</sup> Raw reads frequency to the bin-genomes was calculated by read mapping of raw DNA reads to contigs.

<sup>e</sup> Contig was assigned to phylum "*Mixed*" when several phyla classified to ORFs within single contigs not met to contig taxonomic binning criteria.

Supplementary Table S8. Summary of mRNA read counts and mRNA/DNA ratio of bin-genomes.

| Taxonomy of contigs<br>Bin-genome ID | No. of<br>gene/ORF <sup>a</sup> | No. of<br>CDSs <sup>b</sup> | Normalized total reads mapped to ORFs <sup>c</sup> |             |            | mRNA/DNA ratio |             |             |             |
|--------------------------------------|---------------------------------|-----------------------------|----------------------------------------------------|-------------|------------|----------------|-------------|-------------|-------------|
|                                      |                                 |                             | DNA                                                | MFC<br>mRNA | SP<br>mRNA | OC<br>mRNA     | MFC         | SP          | OC          |
| <i>Desulfobulbaceae</i>              | 1338                            | 349                         | 13220                                              | 391         | 502        | 470            | 0.40        | 0.51        | 0.48        |
| Bin-genome DB1                       | 3188                            | 2657                        | 357161                                             | 6801        | 16537      | 12604          | <b>0.25</b> | <b>0.62</b> | <b>0.47</b> |
| Bin-genome DB2                       | 2217                            | 1681                        | 66985                                              | 5092        | 6731       | 7263           | <b>1.02</b> | <b>1.34</b> | <b>1.45</b> |
| <i>Desulfobacteraceae</i>            | 19016                           | 6954                        | 200806                                             | 12507       | 11344      | 11181          | 0.83        | 0.76        | 0.74        |
| Bin-genome DF1                       | 3272                            | 3042                        | 131407                                             | 26412       | 26118      | 28771          | 2.69        | 2.66        | 2.93        |
| Bin-genome DF2                       | 2967                            | 2463                        | 90121                                              | 19472       | 19345      | 18272          | 2.89        | 2.87        | 2.71        |
| <i>Desulfuromonadales</i>            | 10512                           | 4453                        | 131946                                             | 7269        | 8533       | 10861          | <b>0.74</b> | <b>0.87</b> | <b>1.10</b> |
| Bin-genomeDM1                        | 3361                            | 2352                        | 96450                                              | 9265        | 11678      | 12489          | <b>1.29</b> | <b>1.62</b> | <b>1.73</b> |
| <i>Syntrophobacterales</i>           | 12807                           | 4826                        | 137645                                             | 11063       | 10031      | 10314          | 1.08        | 0.98        | 1.00        |
| Other <i>Deltaproteobacteria</i>     | 24346                           | 6338                        | 314757                                             | 14240       | 13319      | 14779          | 0.61        | 0.57        | 0.63        |
| <i>Betaproteobacteria</i>            | 14993                           | 2126                        | 176664                                             | 1891        | 1496       | 1502           | 0.14        | 0.11        | 0.11        |
| Bin-genome Bet1                      | 3020                            | 907                         | 137938                                             | 1119        | 906        | 1099           | <b>0.11</b> | <b>0.09</b> | <b>0.11</b> |
| <i>Gamma proteobacteria</i>          | 13570                           | 2117                        | 153189                                             | 2293        | 2027       | 2356           | 0.20        | 0.18        | 0.21        |
| <i>Alphaproteobacteria</i>           | 7967                            | 1058                        | 72696                                              | 1249        | 1200       | 1161           | 0.23        | 0.22        | 0.21        |
| Other <i>Proteobacteria</i>          | 7555                            | 2117                        | 235246                                             | 4518        | 3799       | 4554           | 0.26        | 0.22        | 0.26        |
| <i>Bacteroidetes</i>                 | 24523                           | 2345                        | 187970                                             | 1401        | 1304       | 1271           | 0.10        | 0.09        | 0.09        |
| Bin-genome Bac1                      | 2514                            | 999                         | 140756                                             | 971         | 830        | 949            | 0.09        | 0.08        | 0.09        |
| Bin-genome Bac2                      | 3748                            | 879                         | 120067                                             | 909         | 732        | 706            | <b>0.10</b> | <b>0.08</b> | <b>0.08</b> |
| <i>Chloroflexi</i>                   | 6112                            | 1109                        | 49687                                              | 1074        | 1095       | 1145           | 0.29        | 0.29        | 0.31        |
| Ch11 mix                             | 3715                            | 1427                        | 122223                                             | 1621        | 1431       | 1571           | <b>0.18</b> | <b>0.16</b> | <b>0.17</b> |
| <i>Firmicutes</i>                    | 33792                           | 4973                        | 295457                                             | 4002        | 3650       | 3832           | 0.18        | 0.17        | 0.17        |
| Phylum <i>Mixed</i> <sup>d</sup>     | 17683                           | 2930                        | 314723                                             | 3050        | 2709       | 2708           | 0.13        | 0.12        | 0.12        |
| Bin-genome Unc1                      | 3081                            | 1345                        | 149983                                             | 1782        | 1369       | 1598           | 0.16        | 0.12        | 0.14        |
| Bin-genome Unc2                      | 2634                            | 255                         | 83890                                              | 192         | 170        | 160            | 0.03        | 0.03        | 0.03        |
| <i>Euryarchaeota</i>                 | 11094                           | 3043                        | 221138                                             | 7956        | 6956       | 5913           | 0.48        | 0.42        | 0.36        |
| Bin-genome MS1                       | 2155                            | 2071                        | 660724                                             | 57989       | 51441      | 46861          | <b>1.17</b> | <b>1.04</b> | <b>0.95</b> |
| Other Phyla                          | 118711                          | 13849                       | 961865                                             | 12801       | 12077      | 12941          | 0.18        | 0.17        | 0.18        |
| Total                                | 359891                          | 78665                       | 5624719                                            | 217331      | 217331     | 217331         | 15.8        | 16.4        | 16.8        |

<sup>a</sup> Numbers of ORFs have potential errors in metagenomic ORF calling because of incomplete assemblies.

<sup>b</sup> Numbers of CDSs were counted of ORFs where at least one mRNA read was mapped on the criteria of 50% length cut-off and 95% identity.

<sup>c</sup> Raw reads counts to the bin-genomes were calculated by read mapping of raw DNA or mRNA reads to ORFs. The total DNA reads were calculated as means of three operational conditions. The total mRNA reads of each condition were normalized by DNA reads of each condition.

<sup>d</sup> Contig was assigned to phylum "Mixed" when several phyla classified to ORFs within single contigs not met to contig taxonomic binning criteria.

Supplementary Table S9. Top10 highly-expressed annotated ORFs in Bin-genome DB1 under three operational conditions.

| Peptide ID on JCVI metagenomic pipeline   | Peptide Length | UniRef Common name                                           | KO     | CytC family <sup>b</sup> | MFC <sup>a</sup> mRNA (RPKM) | SP <sup>a</sup> mRNA (RPKM) | OC <sup>a</sup> mRNA (RPKM) | DNA <sup>c</sup> (RPKM) | Contig ID <sup>d</sup> | ORF Start <sup>d</sup> | ORF End <sup>d</sup> |
|-------------------------------------------|----------------|--------------------------------------------------------------|--------|--------------------------|------------------------------|-----------------------------|-----------------------------|-------------------------|------------------------|------------------------|----------------------|
| <b>[condition MFC]</b>                    |                |                                                              |        |                          |                              |                             |                             |                         |                        |                        |                      |
| orf.1133802016390.1                       | 136            | -                                                            | -      | -                        | 2882.9                       | <b>473.5</b>                | <b>116.7</b>                | 27.1                    | contig_833             | 66044                  | 66452                |
| orf.1133784620494.1                       | 218            | -                                                            | -      | -                        | 2039.9                       | <b>1318.9</b>               | <b>7352.2</b>               | 22.8                    | contig_722             | 10882                  | 11536                |
| orf.1133802155256.1                       | 237            | prepilin-type cleavage/methylation N-terminal domain protein | -      | -                        | 1446.6                       | 947.8                       | 584.4                       | 20.7                    | contig_138             | 86006                  | 86717                |
| orf.1133802016396.1                       | 105            | -                                                            | -      | -                        | 1422.5                       | <b>114.1</b>                | <b>13.7</b>                 | 26.9                    | contig_833             | 66494                  | 66809                |
| orf.1133802016560.1                       | 399            | cytochrome c family protein, putative                        | -      | 1964 (7)                 | 1084.7                       | <b>93.8</b>                 | <b>10.8</b>                 | 25.6                    | contig_833             | 67802                  | 68999                |
| orf.1133802088848.1                       | 406            | polysulfide reductase NrfD                                   | -      | -                        | 1015.9                       | <b>520.1</b>                | <b>1083.8</b>               | 21.8                    | contig_1236            | 11359                  | 12577                |
| orf.1133803259248.1                       | 814            | putative flagellin protein                                   | K02406 | -                        | 952.9                        | 723.0                       | 1058.1                      | 23.8                    | contig_879             | 123802                 | 126244               |
| orf.1133802642656.1                       | 153            | putative hspC2 heat shock protein                            | K13993 | -                        | 898.6                        | 685.2                       | 471.5                       | 26.0                    | contig_58              | 16821                  | 17280                |
| orf.1133802016578.1                       | 207            | cytochrome B561                                              | -      | -                        | 869.1                        | <b>79.6</b>                 | <b>20.9</b>                 | 15.4                    | contig_833             | 69064                  | 69685                |
| orf.1133784620364.1                       | 161            | -                                                            | -      | -                        | 780.1                        | <b>474.4</b>                | <b>6155.9</b>               | 22.9                    | contig_722             | 10066                  | 10549                |
| orf.1133802022530.1                       | 341            | PEP-C-TERM putative exosortase interaction domain            | -      | -                        | 691.9                        | 579.7                       | <b>165.0</b>                | 26.5                    | contig_96              | 20041                  | 21064                |
| orf.1133802804278.1                       | 91             | -                                                            | -      | -                        | 559.5                        | 411.4                       | 428.0                       | 19.6                    | contig_359             | 55164                  | 55437                |
| orf.1133802293742.1                       | 458            | -                                                            | -      | -                        | 548.5                        | 654.0                       | 570.1                       | 25.2                    | contig_771             | 388                    | 1762                 |
| orf.1133802088804.1                       | 90             | -                                                            | -      | -                        | 528.0                        | <b>266.2</b>                | <b>593.1</b>                | 24.2                    | contig_1236            | 10924                  | 11194                |
| orf.1133803319958.1                       | 92             | histone family protein DNA-binding protein                   | K03530 | -                        | 498.1                        | 732.5                       | <b>407.7</b>                | 25.1                    | contig_3709            | 13259                  | 13535                |
| orf.1133803055150.1                       | 223            | peptidoglycan-associated lipoprotein                         | K03640 | -                        | 426.2                        | <b>1074.5</b>               | 802.2                       | 17.0                    | contig_2301            | 3386                   | 4055                 |
| orf.1133802016588.1                       | 251            | -                                                            | -      | (-1)                     | 385.4                        | <b>11.9</b>                 | 11.5                        | 13.9                    | contig_833             | 69414                  | 70167                |
| orf.1133784620342.1                       | 103            | -                                                            | -      | -                        | 362.5                        | 276.2                       | <b>3445.6</b>               | 19.4                    | contig_722             | 9580                   | 9889                 |
| orf.1133802088862.1                       | 132            | transcriptional regulator, merR family                       | K13640 | -                        | 360.0                        | <b>56.7</b>                 | <b>196.7</b>                | 24.3                    | contig_1236            | 12645                  | 13041                |
| <b>[additional genes in condition SP]</b> |                |                                                              |        |                          |                              |                             |                             |                         |                        |                        |                      |
| orf.1133803564556.1                       | 55             | -                                                            | -      | -                        | 0.0                          | <b>6861.5</b>               | <b>1678.7</b>               | 24.9                    | contig_948             | 55708                  | 55873                |
| orf.1133803564564.1                       | 71             | -                                                            | -      | -                        | 0.0                          | <b>6475.3</b>               | <b>3352.6</b>               | 21.7                    | contig_948             | 55885                  | 56098                |
| orf.1133784552376.1                       | 81             | -                                                            | -      | -                        | 230.5                        | <b>6082.7</b>               | <b>2511.3</b>               | 23.1                    | contig_90              | 23140                  | 23383                |
| orf.1133803564578.1                       | 193            | -                                                            | -      | -                        | 70.4                         | <b>5260.8</b>               | <b>2982.5</b>               | 20.4                    | contig_948             | 56155                  | 56734                |
| orf.1133784552372.1                       | 203            | -                                                            | -      | -                        | 16.7                         | <b>4249.2</b>               | <b>1186.8</b>               | 20.0                    | contig_90              | 23436                  | 24045                |
| orf.1133784552518.1                       | 459            | -                                                            | -      | -                        | 55.5                         | <b>1742.3</b>               | 1452.1                      | 21.6                    | contig_90              | 21732                  | 23109                |
| orf.1133784552542.1                       | 293            | uspA domain protein                                          | K07090 | -                        | 17.4                         | <b>1466.9</b>               | 1654.4                      | 21.6                    | contig_90              | 20882                  | 21761                |
| orf.1133803540748.1                       | 66             | -                                                            | -      | -                        | 128.6                        | <b>703.4</b>                | <b>240.4</b>                | 34.9                    | contig_345             | 100580                 | 100778               |
| orf.1133803564446.1                       | 551            | chaperonin groL                                              | K04077 | -                        | 73.9                         | <b>521.8</b>                | <b>149.2</b>                | 20.7                    | contig_948             | 9500                   | 11153                |
| orf.1133803564400.1                       | 145            | chaperonin 10 Kd subunit                                     | K04078 | -                        | 35.1                         | <b>464.8</b>                | <b>79.6</b>                 | 19.0                    | contig_948             | 11252                  | 11687                |
| <b>[additional genes in condition OC]</b> |                |                                                              |        |                          |                              |                             |                             |                         |                        |                        |                      |
| orf.1133784620352.1                       | 71             | -                                                            | -      | -                        | 310.8                        | <b>147.6</b>                | <b>2194.5</b>               | 18.6                    | contig_722             | 9944                   | 10157                |
| orf.1133802523796.1                       | 108            | -                                                            | -      | -                        | 172.9                        | <b>97.1</b>                 | <b>1389.2</b>               | 24.7                    | contig_259             | 65724                  | 66048                |
| orf.1133802522876.1                       | 401            | -                                                            | -      | -                        | 42.3                         | 37.3                        | <b>528.9</b>                | 18.2                    | contig_259             | 66060                  | 67263                |
| orf.1133801860664.1                       | 128            | ribosomal protein L7/L12                                     | K02935 | -                        | 0.0                          | <b>58.5</b>                 | <b>439.6</b>                | 22.3                    | contig_2562            | 3358                   | 3742                 |
| orf.1133801860656.1                       | 176            | ribosomal protein L10                                        | K02864 | -                        | 9.6                          | <b>110.6</b>                | <b>434.4</b>                | 23.1                    | contig_2562            | 2791                   | 3319                 |
| orf.1133802110998.1                       | 104            | ribosomal protein S10                                        | K02946 | -                        | 32.6                         | <b>144.0</b>                | <b>402.3</b>                | 23.6                    | contig_12942           | 41                     | 353                  |

<sup>a</sup> Highly-expressed genes were picked from biggest mRNA RPKM to tenth UniRef annotated gene for each condition (yellow highlighted).

Upregulated genes showed red letters, while down-regulated genes showed blue letters.

<sup>b</sup> c-type cytochrome family was defined by Bulter *et al.* (BMC Genomics, 2010, 11:40). Number of heme binding CXXCH domain is described in paraphrase.

<sup>c</sup> DNA frequency (DNA-RPKM) was an average of three operational conditions.

<sup>d</sup> Potential operons (gene cluster within the contig) were highlighted by different colors.



Supplementary Table S10. Top10 highly-expressed annotated ORFs in Bin-genome DM1 under three operational conditions.

| Peptide ID on JCVI metagenomic pipeline    | Peptide Length | UniRef Common name                                      | KO     | CytC family <sup>b</sup> | MFC <sup>a</sup> mRNA (RPKM) | SP <sup>a</sup> mRNA (RPKM) | OC <sup>a</sup> mRNA (RPKM) | DNA <sup>c</sup> (RPKM) | Contig ID <sup>d</sup> | ORF Start <sup>d</sup> | ORF End <sup>d</sup> |  |
|--------------------------------------------|----------------|---------------------------------------------------------|--------|--------------------------|------------------------------|-----------------------------|-----------------------------|-------------------------|------------------------|------------------------|----------------------|--|
| <b>[condition MFC]</b>                     |                |                                                         |        |                          |                              |                             |                             |                         |                        |                        |                      |  |
| orf.1133794964200.1                        | 303            | citrate (S)-synthase <sup>e</sup>                       | K01647 | -                        | 4883.9                       | <b>1254.6</b>               | 1767.5                      | 5.6                     | contig_81654           | 0                      | 908                  |  |
| orf.1133793756148.1                        | 102            | citrate (S)-synthase <sup>e</sup>                       | K01647 | -                        | 1936.6                       | <b>441.9</b>                | <b>879.8</b>                | 9.3                     | contig_203048          | 203                    | 508                  |  |
| orf.1133785393793.1                        | 98             | class III cytochrome C family                           | -      | 2890 (3)                 | 1610.7                       | 1176.7                      | 1177.7                      | 8.8                     | contig_41276           | 299                    | 593                  |  |
| orf.1133802795474.1                        | 537            | acetyl-coA hydrolase/transferase                        | -      | -                        | 1093.6                       | <b>237.0</b>                | <b>486.3</b>                | 6.8                     | contig_2418            | 7803                   | 9414                 |  |
| orf.1133803043328.1                        | 277            | -                                                       | -      | -                        | 913.0                        | 654.2                       | 656.2                       | 10.0                    | contig_4502            | 5644                   | 6475                 |  |
| orf.1133802117908.1                        | 49             | lipoprotein                                             | -      | -                        | 796.7                        | <b>489.0</b>                | 441.6                       | 18.5                    | contig_12609           | 849                    | 996                  |  |
| orf.1133801731582.1                        | 833            | formate C-acetyltransferase                             | K00656 | -                        | 768.2                        | 715.5                       | 583.6                       | 9.5                     | contig_10352           | 3207                   | 5706                 |  |
| orf.1133795138440.1                        | 319            | malate dehydrogenase, NAD-dependent                     | K00024 | -                        | 713.0                        | 591.5                       | 587.9                       | 8.7                     | contig_65882           | 282                    | 1239                 |  |
| orf.1133803529874.1                        | 79             | -                                                       | -      | -                        | 687.5                        | <b>227.5</b>                | <b>1059.2</b>               | 14.7                    | contig_800             | 6497                   | 6734                 |  |
| orf.1133796818988.1                        | 97             | -                                                       | -      | -                        | 682.4                        | <b>262.5</b>                | <b>937.0</b>                | 6.9                     | contig_44061           | 2633                   | 2924                 |  |
| orf.1133803043304.1                        | 135            | -                                                       | -      | -                        | 678.9                        | <b>321.7</b>                | 299.2                       | 6.0                     | contig_4502            | 2641                   | 3046                 |  |
| orf.1133785521143.1                        | 76             | -                                                       | -      | -                        | 580.7                        | <b>236.5</b>                | <b>835.2</b>                | 14.7                    | contig_53727           | 1                      | 229                  |  |
| orf.1133802310598.1                        | 518            | NADH-quinone oxidoreductase, chain M                    | K00342 | -                        | 560.3                        | <b>286.2</b>                | 370.4                       | 5.1                     | contig_8254            | 2914                   | 4468                 |  |
| orf.1133803043292.1                        | 248            | succinate dehydrogenase subunit B                       | K00240 | -                        | 554.4                        | 410.6                       | 383.9                       | 7.5                     | contig_4502            | 3109                   | 3853                 |  |
| orf.1133803529886.1                        | 90             | -                                                       | -      | -                        | 528.0                        | 332.8                       | <b>897.6</b>                | 12.2                    | contig_800             | 6232                   | 6502                 |  |
| orf.1133803043276.1                        | 639            | succinate dehydrogenase, flavoprotein subunit           | K00239 | -                        | 499.4                        | 339.8                       | 438.0                       | 7.2                     | contig_4502            | 3849                   | 5766                 |  |
| orf.1133802310514.1                        | 168            | NADH-ubiquinone/plastoquinone oxidoreductase, chain 6   | K00339 | -                        | 495.0                        | <b>240.7</b>                | 352.1                       | 5.7                     | contig_8254            | 2                      | 506                  |  |
| orf.1133801927240.1                        | 330            | -                                                       | -      | 64omcS (3)               | 473.2                        | 322.2                       | 271.0                       | 6.0                     | contig_10083           | 8233                   | 9223                 |  |
| <b>[additional genes in condition SPI]</b> |                |                                                         |        |                          |                              |                             |                             |                         |                        |                        |                      |  |
| orf.1133803459982.1                        | 89             | ATP synthase F0, C subunit                              | K02110 | -                        | 152.6                        | <b>1295.6</b>               | 891.5                       | 8.0                     | contig_6703            | 3115                   | 3382                 |  |
| orf.1133803545608.1                        | 118            | acyl carrier protein                                    | K02078 | -                        | 244.5                        | <b>888.4</b>                | 978.1                       | 12.8                    | contig_134             | 2572                   | 2926                 |  |
| orf.1133795138470.1                        | 199            | 2-oxoglutarate ferredoxin oxidoreductase, alpha subunit | K00174 | -                        | 427.2                        | <b>851.8</b>                | 755.2                       | 6.1                     | contig_65882           | 1619                   | 2215                 |  |
| orf.1133801962216.1                        | 181            | ribosomal protein L10                                   | K02864 | -                        | 112.5                        | <b>843.9</b>                | 765.2                       | 9.7                     | contig_14006           | 602                    | 1145                 |  |
| orf.1133802318530.1                        | 143            | ribosomal protein L20                                   | K02887 | -                        | 189.9                        | <b>795.9</b>                | 696.1                       | 10.1                    | contig_5810            | 9094                   | 9523                 |  |
| orf.1133802644130.1                        | 86             | ribosomal protein L22                                   | K02890 | -                        | 138.2                        | <b>783.6</b>                | 469.7                       | 7.3                     | contig_7413            | 18625                  | 18883                |  |
| orf.1133795138452.1                        | 64             | iron-sulfur cluster-binding protein                     | K00176 | -                        | 397.8                        | <b>702.0</b>                | 698.8                       | 6.2                     | contig_65882           | 1428                   | 1620                 |  |
| <b>[additional genes in condition OC]</b>  |                |                                                         |        |                          |                              |                             |                             |                         |                        |                        |                      |  |
| orf.1133802347582.1                        | 177            | ribosomal protein L21                                   | K02888 | -                        | 191.8                        | <b>499.2</b>                | 627.6                       | 11.1                    | contig_7819            | 1765                   | 2296                 |  |

<sup>a</sup> Highly-expressed genes were picked from biggest mRNA RPKM to tenth UniRef annotated gene for each condition (yellow highlighted).  
Upregulated genes showed red letters, while down-regulated genes showed blue letters.

<sup>b</sup> c-type cytochrome family was defined by Bulter *et al.* (BMC Genomics, 2010, 11:40). Number of heme binding CXXCH domain is described in paraphrase.

<sup>c</sup> DNA frequency (DNA-RPKM) was an average of three operational conditions.

<sup>d</sup> Potential operons (gene cluster within the contig) were highlighted by different colors.

<sup>e</sup> These two citrate synthases were probably misconnected. Those genes were counted as a single gene for picking term most expressed genes.

Supplementary Table S11. Top10 highly-expressed annotated ORFs in Bin-genomes DF1, DF2, and DB2 under three operational conditions.

| Peptide ID on JCVI metagenomic pipeline   | Peptide Length | UniRef Common name                                        | KO     | CytC family | MFC <sup>a</sup> mRNA (RPKM) | SP <sup>a</sup> mRNA (RPKM) | OC <sup>a</sup> mRNA (RPKM) | DNA <sup>b</sup> (RPKM) | Contig ID <sup>c</sup> | ORF Start <sup>c</sup> | ORF End <sup>c</sup> |
|-------------------------------------------|----------------|-----------------------------------------------------------|--------|-------------|------------------------------|-----------------------------|-----------------------------|-------------------------|------------------------|------------------------|----------------------|
| <b>Bin-genome DF1</b>                     |                |                                                           |        |             |                              |                             |                             |                         |                        |                        |                      |
| <b>[condition MFC]</b>                    |                |                                                           |        |             |                              |                             |                             |                         |                        |                        |                      |
| orf.1133803263250.1                       | 46             | -                                                         | -      | -           | 2376.2                       | 1763.8                      | 1955.6                      | 15.4                    | contig_2329            | 0                      | 136                  |
| orf.1133802880730.1                       | 502            | adenylsulfate reductase, alpha subunit                    | K00394 | -           | 2180.8                       | 2303.0                      | 2566.3                      | 8.0                     | contig_3549            | 424                    | 1930                 |
| orf.1133802880684.1                       | 67             | adenosine-5'-phosphosulfate reductase alpha subunit       | K00394 | -           | 2102.6                       | 2034.0                      | 2174.7                      | 5.9                     | contig_3549            | 0                      | 201                  |
| orf.1133794978062.1                       | 105            | aprA (fragment)                                           | K00394 | -           | 1718.9                       | 2174.8                      | 2274.2                      | 8.4                     | contig_80176           | 388                    | 702                  |
| orf.1133802867116.1                       | 438            | -                                                         | -      | -           | 1677.9                       | 1795.0                      | 2150.8                      | 7.3                     | contig_1743            | 9147                   | 10461                |
| orf.1133802700666.1                       | 438            | sulfite reductase, dissimilatory-type alpha subunit       | K11180 | -           | 1658.5                       | 1504.4                      | 1788.5                      | 8.5                     | contig_10831           | 19743                  | 21057                |
| orf.1133802700806.1                       | 383            | sulfite reductase, dissimilatory-type beta subunit        | K11181 | -           | 1639.7                       | 1454.5                      | 1909.7                      | 8.0                     | contig_10831           | 18579                  | 19728                |
| orf.1133803003758.1                       | 120            | -                                                         | -      | -           | 1555.8                       | <b>873.6</b>                | <b>1887.5</b>               | 6.7                     | contig_892             | 167749                 | 168109               |
| orf.1133802169864.1                       | 94             | ATP synthase F0, C subunit                                | K02110 | -           | 1282.0                       | 1258.6                      | 1841.7                      | 9.5                     | contig_3114            | 31355                  | 31637                |
| orf.1133802700820.1                       | 100            | dissimilatory sulfite reductase D                         | -      | -           | 1273.0                       | 1198.0                      | 865.6                       | 10.0                    | contig_10831           | 18267                  | 18567                |
| orf.1133784536440.1                       | 391            | adh4                                                      | K13954 | -           | 1224.1                       | <b>693.2</b>                | 752.7                       | 8.5                     | contig_10504           | 4459                   | 5632                 |
| orf.1133802831506.1                       | 423            | sulfate adenylyltransferase                               | K00958 | -           | 1143.6                       | 1210.8                      | 1244.8                      | 9.4                     | contig_7483            | 17933                  | 19202                |
| orf.1133801811484.1                       | 62             | 4Fe-4S binding domain                                     | -      | -           | 1067.6                       | <b>1739.1</b>               | 1303.0                      | 8.0                     | contig_1245            | 9715                   | 9901                 |
| <b>[additional genes in condition SP]</b> |                |                                                           |        |             |                              |                             |                             |                         |                        |                        |                      |
| orf.1133802813022.1                       | 87             | -                                                         | -      | -           | 897.4                        | <b>1824.6</b>               | <b>3100.9</b>               | 7.2                     | contig_3060            | 46367                  | 46628                |
| orf.1133803041966.1                       | 675            | V-type H(+)-translocating pyrophosphatase                 | K15987 | -           | 990.7                        | 1109.3                      | 1258.8                      | 9.1                     | contig_296             | 6571                   | 8596                 |
| <b>[additional genes in condition OC]</b> |                |                                                           |        |             |                              |                             |                             |                         |                        |                        |                      |
| orf.1133802813032.1                       | 94             | -                                                         | -      | -           | 433.3                        | <b>701.0</b>                | <b>1473.3</b>               | 7.9                     | contig_3060            | 46059                  | 46341                |
| orf.1133784607782.1                       | 106            | sulfur relay protein, tusE/dsrC/dsvC family               | K11179 | -           | 960.7                        | 1045.5                      | 1088.8                      | 7.4                     | contig_970             | 24102                  | 24420                |
| <b>Bin-genome DF2</b>                     |                |                                                           |        |             |                              |                             |                             |                         |                        |                        |                      |
| <b>[condition MFC]</b>                    |                |                                                           |        |             |                              |                             |                             |                         |                        |                        |                      |
| orf.1133785657059.1                       | 155            | -                                                         | -      | -           | 2452.9                       | 1942.0                      | 1805.6                      | 5.7                     | contig_51019           | 5143                   | 5608                 |
| orf.1133785656869.1                       | 127            | adenylsulfate reductase, beta subunit                     | K00395 | -           | 1977.9                       | 1922.1                      | 1806.2                      | 4.8                     | contig_51019           | 5662                   | 6043                 |
| orf.1133802313416.1                       | 401            | translation elongation factor Tu                          | K02358 | -           | 1794.6                       | 1385.5                      | 1259.2                      | 4.8                     | contig_2574            | 2178                   | 3381                 |
| orf.1133797985438.1                       | 68             | -                                                         | -      | -           | 1672.3                       | 2290.4                      | 2142.8                      | 3.8                     | contig_20813           | 22756                  | 22960                |
| orf.1133802580362.1                       | 384            | sulfite reductase, dissimilatory-type beta subunit        | K11181 | -           | 1644.2                       | 1255.8                      | 1115.8                      | 6.8                     | contig_3719            | 5149                   | 6301                 |
| orf.1133794482838.1                       | 332            | porC1                                                     | K00174 | -           | 1421.2                       | 1204.4                      | 1216.7                      | 7.0                     | contig_61326           | 1711                   | 2707                 |
| orf.1133803395114.1                       | 269            | aprA                                                      | K00394 | -           | 1381.8                       | 1224.8                      | 1099.4                      | 4.5                     | contig_6732            | 0                      | 807                  |
| orf.1133802073614.1                       | 215            | succinate dehydrogenase cytochrome B subunit, b558 family | K00241 | -           | 1349.9                       | 1448.8                      | 1207.8                      | 5.0                     | contig_9969            | 10534                  | 11179                |
| orf.1133802353762.1                       | 516            | acetyl-coA hydrolase                                      | K01067 | -           | 1325.6                       | 1099.9                      | 752.1                       | 5.6                     | contig_14426           | 12939                  | 14487                |
| orf.1133802073670.1                       | 638            | succinate dehydrogenase, flavoprotein subunit             | K00239 | -           | 1258.3                       | 1030.4                      | 1035.6                      | 5.4                     | contig_9969            | 11207                  | 13121                |
| orf.1133802580324.1                       | 442            | sulfite reductase, dissimilatory-type alpha subunit       | K11180 | -           | 1178.9                       | 1016.4                      | 943.3                       | 5.8                     | contig_3719            | 6313                   | 7639                 |
| orf.1133794482804.1                       | 61             | porC1                                                     | K00174 | -           | 1168.6                       | 810.2                       | 1158.9                      | 3.9                     | contig_61326           | 1337                   | 1520                 |
| orf.1133802073690.1                       | 264            | 4Fe-4S ferredoxin iron-sulfur binding domain protein      | K00240 | -           | 1144.4                       | 896.3                       | 857.9                       | 5.5                     | contig_9969            | 13096                  | 13888                |
| orf.1133784586864.1                       | 410            | ATP citrate lyase subunit 1                               | K01648 | -           | 1084.6                       | 799.9                       | 714.3                       | 6.2                     | contig_10548           | 6122                   | 7352                 |
| <b>[additional genes in condition SP]</b> |                |                                                           |        |             |                              |                             |                             |                         |                        |                        |                      |
| orf.1133785657075.1                       | 32             | -                                                         | -      | -           | 901.7                        | 1170.0                      | <b>676.2</b>                | 3.7                     | contig_51019           | 5996                   | 6092                 |
| orf.1133793461756.1                       | 198            | peptidoglycan-associated lipoprotein                      | K03640 | -           | 857.2                        | 1096.7                      | 772.3                       | 6.5                     | contig_96379           | 107                    | 701                  |
| orf.1133794482802.1                       | 70             | fdx9                                                      | K00176 | -           | 921.4                        | 1091.1                      | 845.0                       | 4.8                     | contig_61326           | 1127                   | 1337                 |
| <b>[additional genes in condition OC]</b> |                |                                                           |        |             |                              |                             |                             |                         |                        |                        |                      |
| orf.1133802097708.1                       | 70             | ribosomal protein S21                                     | K02970 | -           | 388.0                        | <b>855.7</b>                | 968.6                       | 6.8                     | contig_10218           | 14393                  | 14603                |
| orf.1133794482850.1                       | 274            | porB1                                                     | K00175 | -           | 1015.9                       | 869.0                       | 874.0                       | 6.4                     | contig_61326           | 2708                   | 3530                 |
| <b>Bin-genome DB2</b>                     |                |                                                           |        |             |                              |                             |                             |                         |                        |                        |                      |
| <b>[condition MFC]</b>                    |                |                                                           |        |             |                              |                             |                             |                         |                        |                        |                      |
| orf.1133803592912.1                       | 386            | sulfite reductase, dissimilatory-type beta subunit        | K11181 | -           | 756.3                        | 822.5                       | 755.0                       | 5.0                     | contig_3727            | 33125                  | 34283                |
| orf.1133786532312.1                       | 141            | adenylsulfate reductase, beta subunit                     | K00395 | -           | 650.0                        | 743.5                       | 552.5                       | 7.1                     | contig_22118           | 11571                  | 11994                |
| orf.1133803592876.1                       | 436            | sulfite reductase, dissimilatory-type alpha subunit       | K11180 | -           | 603.4                        | 642.3                       | 602.2                       | 6.2                     | contig_3727            | 34309                  | 35617                |
| orf.1133786532358.1                       | 674            | adenylsulfate reductase, alpha subunit                    | K00394 | -           | 599.3                        | 631.0                       | 590.8                       | 4.7                     | contig_22118           | 12031                  | 14053                |
| orf.1133784579314.1                       | 195            | related to peptidoglycan-associated lipoprotein           | K03640 | -           | 530.9                        | 529.9                       | 562.3                       | 5.6                     | contig_3883            | 1190                   | 1775                 |
| orf.1133803220876.1                       | 431            | -                                                         | -      | -           | 500.1                        | 472.5                       | 468.6                       | 4.7                     | contig_4092            | 49820                  | 51113                |
| orf.1133803028242.1                       | 112            | sulfur relay protein, tusE/dsrC/dsvC family               | K11179 | -           | 500.1                        | 427.9                       | 502.4                       | 8.4                     | contig_7987            | 1934                   | 2270                 |
| orf.1133803323896.1                       | 428            | sulfate adenylyltransferase                               | K00958 | -           | 460.0                        | 405.9                       | 337.1                       | 6.5                     | contig_219             | 40329                  | 41613                |
| orf.1133803592922.1                       | 86             | probable dsrD protein                                     | -      | -           | 453.9                        | 539.8                       | <b>268.4</b>                | 5.7                     | contig_3727            | 32781                  | 33039                |
| orf.1133803556266.1                       | 404            | probable alcohol dehydrogenase                            | K13954 | -           | 382.3                        | <b>893.3</b>                | 1260.5                      | 7.3                     | contig_3779            | 4795                   | 6007                 |
| orf.1133803593538.1                       | 99             | ATP synthase F0, C subunit                                | K02110 | -           | 325.7                        | 272.3                       | 320.6                       | 6.0                     | contig_3727            | 13659                  | 13956                |
| <b>[additional genes in condition SP]</b> |                |                                                           |        |             |                              |                             |                             |                         |                        |                        |                      |
| orf.1133802964310.1                       | 398            | translation elongation factor Tu                          | K02358 | -           | 324.1                        | <b>662.2</b>                | 576.3                       | 10.5                    | contig_1998            | 54593                  | 55787                |
| <b>[additional genes in condition OC]</b> |                |                                                           |        |             |                              |                             |                             |                         |                        |                        |                      |
| orf.1133802964430.1                       | 227            | ribosomal protein S3                                      | K02982 | -           | 67.3                         | <b>270.5</b>                | 362.3                       | 5.7                     | contig_1998            | 50279                  | 50960                |
| orf.1133802964020.1                       | 128            | ribosomal protein L7/L12                                  | K02935 | -           | 132.6                        | <b>245.7</b>                | 338.1                       | 6.0                     | contig_1998            | 67826                  | 68210                |

<sup>a</sup> Highly-expressed genes were picked from biggest mRNA RPKM to tenth UniRef annotated gene for each conditions for each conditions (yellow highlighted).

Upregulated genes showed red letters, while down-regulated genes showed blue letters.

<sup>b</sup> DNA frequency (DNA-RPKM) was an average of three operational conditions.

<sup>c</sup> Potential operons (gene cluster within the contig) were highlighted by different colors.

Supplementary Table S12. Top10 highly-expressed annotated ORFs in Bin-genomes Bac1 and Bac2.

| Peptide ID on JCVI metagenomic pipeline   | Peptide Length | UniRef Common name                         | KO     | CytC family | MFC <sup>a</sup> mRNA (RPKM) | SP <sup>a</sup> mRNA (RPKM) | OC <sup>a</sup> mRNA (RPKM) | DNA <sup>b</sup> (RPKM) | Contig ID <sup>c</sup> | ORF Start <sup>c</sup> | ORF End <sup>c</sup> |
|-------------------------------------------|----------------|--------------------------------------------|--------|-------------|------------------------------|-----------------------------|-----------------------------|-------------------------|------------------------|------------------------|----------------------|
| <b>Bin-genome Bac1</b>                    |                |                                            |        |             |                              |                             |                             |                         |                        |                        |                      |
| <b>[condition MFC]</b>                    |                |                                            |        |             |                              |                             |                             |                         |                        |                        |                      |
| orf.1133784698604.1                       | 96             | DNA-binding protein HU                     | K03530 | -           | 106.1                        | <b>31.2</b>                 | 30.1                        | 10.4                    | contig_1046            | 61667                  | 61955                |
| orf.1133802754454.1                       | 285            | -                                          | K03561 | -           | 71.5                         | 63.1                        | 30.4                        | 8.4                     | contig_9               | 135988                 | 136843               |
| orf.1133803606216.1                       | 402            | translation elongation factor Tu           | K02358 | -           | 59.1                         | 37.3                        | 39.5                        | 9.6                     | contig_2880            | 14073                  | 15279                |
| orf.1133802847186.1                       | 251            | -                                          | -      | -           | 40.6                         | 17.9                        | 17.2                        | 10.0                    | contig_5563            | 43998                  | 44751                |
| orf.1133802754486.1                       | 222            | -                                          | -      | -           | 38.2                         | 33.7                        | 26.0                        | 10.0                    | contig_9               | 134641                 | 135307               |
| orf.1133803385764.1                       | 139            | domain of unknown function (DUF1987)       | -      | -           | 36.6                         | 0.0                         | 0.0                         | 8.7                     | contig_2000            | 32691                  | 33108                |
| orf.1133784696812.1                       | 93             | ribosomal protein S19                      | K02965 | -           | 36.5                         | 48.3                        | 0.0                         | 14.4                    | contig_1046            | 29676                  | 29955                |
| orf.1133803606256.1                       | 237            | ribosomal protein L1                       | K02863 | -           | 35.8                         | 0.0                         | 36.5                        | 7.8                     | contig_2880            | 16724                  | 17435                |
| orf.1133785663937.1                       | 95             | histone family protein DNA-binding protein | K03530 | -           | 35.7                         | 0.0                         | 0.0                         | 5.8                     | contig_57761           | 36                     | 321                  |
| orf.1133784696674.1                       | 97             | ribosomal protein L23                      | K02892 | -           | 35.0                         | 15.4                        | 29.7                        | 11.8                    | contig_1046            | 28558                  | 28849                |
| orf.1133803034752.1                       | 153            | small heat shock protein                   | K13993 | -           | 33.3                         | 58.7                        | 56.6                        | 9.9                     | contig_994             | 31539                  | 31998                |
| orf.1133803387704.1                       | 315            | fatty acid synthesis protein               | K03621 | -           | 32.3                         | 9.5                         | 0.0                         | 11.1                    | contig_3689            | 4725                   | 5670                 |
| orf.1133802754470.1                       | 213            | biopolymer transport protein exbD/tolR     | -      | -           | 31.9                         | 7.0                         | 40.6                        | 9.7                     | contig_9               | 135303                 | 135942               |
| <b>[additional genes in condition SP]</b> |                |                                            |        |             |                              |                             |                             |                         |                        |                        |                      |
| orf.1133801837486.1                       | 69             | ribosomal protein L35                      | K02916 | -           | 0.0                          | 43.4                        | 0.0                         | 12.3                    | contig_10564           | 13361                  | 13568                |
| orf.1133784625080.1                       | 71             | -                                          | -      | -           | 23.9                         | 42.2                        | 0.0                         | 11.9                    | contig_5625            | 78185                  | 78398                |
| orf.1133803491136.1                       | 152            | ribosomal protein L13                      | K02871 | -           | 11.2                         | 39.4                        | 19.0                        | 13.6                    | contig_69              | 18512                  | 18968                |
| orf.1133803349344.1                       | 118            | ribosomal protein S6                       | K02990 | -           | 14.4                         | 38.1                        | 48.9                        | 10.3                    | contig_382             | 48225                  | 48579                |
| orf.11337844487352.1                      | 200            | lipoprotein                                | -      | -           | 17.0                         | 37.4                        | 72.1                        | 11.0                    | contig_15141           | 288                    | 888                  |
| orf.1133803606224.1                       | 80             | preprotein translocase, secE subunit       | K03073 | -           | 0.0                          | 37.4                        | 0.0                         | 7.2                     | contig_2880            | 15386                  | 15626                |
| orf.1133802475648.1                       | 123            | -                                          | -      | -           | 0.0                          | 36.5                        | 23.5                        | 12.0                    | contig_14733           | 11487                  | 11856                |
| orf.1133803606266.1                       | 178            | ribosomal protein L10                      | K02864 | -           | 28.6                         | 33.7                        | 16.2                        | 11.2                    | contig_2880            | 17457                  | 17991                |
| orf.1133784697016.1                       | 90             | ribosomal protein S14p/S29e                | K02954 | -           | 0.0                          | 33.3                        | 0.0                         | 7.2                     | contig_1046            | 33415                  | 33685                |
| <b>[additional genes in condition OC]</b> |                |                                            |        |             |                              |                             |                             |                         |                        |                        |                      |
| orf.1133802367100.1                       | 100            | -                                          | -      | -           | 17.1                         | 0.0                         | <b>102.0</b>                | 31.9                    | contig_1256            | 0                      | 299                  |
| orf.1133784696630.1                       | 102            | ribosomal protein S10                      | K02946 | -           | 0.0                          | 0.0                         | 56.6                        | 13.3                    | contig_1046            | 26975                  | 27281                |
| orf.1133784698260.1                       | 186            | -                                          | -      | -           | 9.1                          | 0.0                         | 54.3                        | 10.0                    | contig_1046            | 51286                  | 51844                |
| orf.1133784697006.1                       | 189            | 50S ribosomal protein L5                   | K02931 | -           | 0.0                          | 0.0                         | 53.4                        | 9.3                     | contig_1046            | 32836                  | 33403                |
| orf.1133803606244.1                       | 148            | ribosomal protein L11                      | K02867 | -           | 11.5                         | 30.4                        | 48.7                        | 8.2                     | contig_2880            | 16277                  | 16721                |
| orf.1133784697074.1                       | 61             | ribosomal protein L30                      | K02907 | -           | 0.0                          | 0.0                         | 47.3                        | 8.7                     | contig_1046            | 35598                  | 35781                |
| orf.1133802754852.1                       | 122            | anti-anti-sigma factor                     | K04749 | -           | 0.0                          | 0.0                         | 47.3                        | 10.9                    | contig_9               | 23804                  | 24170                |
| orf.1133802847806.1                       | 123            | ribosomal protein L19                      | K02884 | -           | 13.8                         | 12.2                        | 46.9                        | 9.1                     | contig_5563            | 19510                  | 19879                |
| orf.1133803035064.1                       | 93             | ribosomal protein L31                      | K02909 | -           | 0.0                          | 0.0                         | 46.5                        | 11.5                    | contig_994             | 43099                  | 43378                |
| <b>Bin-genome Bac2</b>                    |                |                                            |        |             |                              |                             |                             |                         |                        |                        |                      |
| <b>[condition MFC]</b>                    |                |                                            |        |             |                              |                             |                             |                         |                        |                        |                      |
| orf.1133803304892.1                       | 91             | DNA-binding protein HU                     | K03530 | -           | 111.9                        | <b>32.9</b>                 | 63.4                        | 5.0                     | contig_6307            | 27914                  | 28187                |
| orf.1133803309864.1                       | 207            | -                                          | -      | -           | 98.4                         | 137.5                       | 195.1                       | 6.1                     | contig_9883            | 21204                  | 21825                |
| orf.1133801914020.1                       | 157            | -                                          | -      | -           | 75.7                         | 57.2                        | 18.4                        | 4.7                     | contig_7536            | 19396                  | 19867                |
| orf.1133803595642.1                       | 1332           | -                                          | -      | -           | 73.9                         | 56.2                        | 40.1                        | 17.8                    | contig_4930            | 79775                  | 83771                |
| orf.1133802498748.1                       | 65             | cold shock protein                         | K03704 | -           | 52.2                         | <b>0.0</b>                  | 0.0                         | 5.0                     | contig_822             | 148970                 | 149165               |
| orf.1133785622539.1                       | 1697           | GLUG domain protein                        | -      | -           | 50.0                         | <b>23.8</b>                 | 21.3                        | 5.4                     | contig_51489           | 0                      | 5091                 |
| orf.1133791172874.1                       | 36             | -                                          | -      | -           | 47.1                         | 41.6                        | 0.0                         | 45.7                    | contig_123242          | 843                    | 951                  |
| orf.1133802066950.1                       | 76             | -                                          | -      | -           | 44.7                         | 19.7                        | 0.0                         | 3.4                     | contig_4911            | 44320                  | 44548                |
| orf.1133802150312.1                       | 648            | NADH dehydrogenase (quinone)               | K00335 | -           | 44.5                         | <b>76.3</b>                 | 55.7                        | 5.4                     | contig_2111            | 69467                  | 71411                |
| orf.1133786266630.1                       | 489            | -                                          | -      | -           | 41.7                         | 55.2                        | 41.4                        | 5.5                     | contig_31161           | 0                      | 1466                 |
| orf.1133803476222.1                       | 334            | rhodanese-related sulfurtransferase        | -      | -           | 40.7                         | 13.5                        | 8.6                         | 5.1                     | contig_3505            | 21148                  | 22150                |
| orf.1133802780984.1                       | 214            | -                                          | -      | -           | 39.7                         | 42.0                        | 6.7                         | 5.6                     | contig_9142            | 22598                  | 23240                |
| orf.1133801988702.1                       | 134            | -                                          | -      | -           | 38.0                         | 11.2                        | 10.8                        | 5.6                     | contig_12211           | 36181                  | 36583                |
| orf.1133802150046.1                       | 187            | response regulator receiver domain         | K02488 | -           | 36.3                         | 8.0                         | 15.4                        | 6.1                     | contig_2111            | 71972                  | 72533                |
| orf.1133802499158.1                       | 188            | ribosomal protein L6                       | K02933 | -           | 36.1                         | 8.0                         | 7.7                         | 5.0                     | contig_822             | 12807                  | 13371                |
| orf.1133802022226.1                       | 189            | -                                          | -      | -           | 35.9                         | 23.8                        | 22.9                        | 4.7                     | contig_16929           | 30912                  | 31479                |
| orf.1133784577104.1                       | 97             | DNA-binding protein HU                     | K03530 | -           | 35.0                         | 46.3                        | 0.0                         | 6.5                     | contig_7100            | 10287                  | 10578                |
| orf.1133797921988.1                       | 396            | translation elongation factor Tu           | K02358 | -           | 34.3                         | 18.9                        | 14.6                        | 5.2                     | contig_32724           | 31771                  | 32959                |
| orf.1133784675958.1                       | 450            | glutamate dehydrogenase, NAD-specific      | K00262 | -           | 33.9                         | 53.2                        | 35.3                        | 5.2                     | contig_12463           | 10076                  | 11426                |
| <b>[additional genes in condition SP]</b> |                |                                            |        |             |                              |                             |                             |                         |                        |                        |                      |
| orf.1133786266578.1                       | 147            | -                                          | -      | -           | 23.1                         | 30.6                        | 0.0                         | 8.9                     | contig_31161           | 1708                   | 2149                 |
| orf.1133803364410.1                       | 98             | ribosomal protein L31                      | K02909 | -           | 0.0                          | 30.6                        | 29.4                        | 3.6                     | contig_1450            | 62763                  | 63057                |
| orf.1133801977942.1                       | 49             | -                                          | -      | -           | 0.0                          | 30.6                        | 0.0                         | 4.0                     | contig_15310           | 28572                  | 28719                |
| orf.1133802498670.1                       | 156            | ribosomal protein S7                       | K02992 | -           | 10.9                         | 28.8                        | 9.2                         | 2.8                     | contig_822             | 22620                  | 23088                |
| orf.1133802150062.1                       | 166            | NADH-quinone oxidoreductase, E subunit     | K00334 | -           | 10.2                         | <b>27.1</b>                 | 26.1                        | 6.5                     | contig_2111            | 71451                  | 71949                |
| orf.1133802499104.1                       | 114            | ribosomal protein L24                      | K02895 | -           | 14.9                         | 26.3                        | 12.7                        | 3.6                     | contig_822             | 14630                  | 14972                |
| orf.1133801807896.1                       | 126            | -                                          | -      | -           | 0.0                          | 23.8                        | 0.0                         | 5.1                     | contig_11662           | 4082                   | 4460                 |
| orf.1133802984176.1                       | 132            | ribosomal protein S9/S16                   | K02996 | -           | 0.0                          | 22.7                        | 10.9                        | 5.9                     | contig_139             | 50219                  | 50615                |
| orf.1133802150344.1                       | 581            | hydrogenase, Fe-only                       | K00336 | -           | 14.6                         | 20.6                        | 9.9                         | 5.0                     | contig_2111            | 67715                  | 69458                |
| <b>[additional genes in condition OC]</b> |                |                                            |        |             |                              |                             |                             |                         |                        |                        |                      |
| orf.1133797922122.1                       | 146            | ribosomal protein L11                      | K02867 | -           | 23.3                         | 10.3                        | 29.6                        | 6.1                     | contig_32724           | 30331                  | 30769                |
| orf.1133802498794.1                       | 100            | ribosomal protein L23                      | K02892 | -           | 0.0                          | 0.0                         | 28.9                        | 5.4                     | contig_822             | 18566                  | 18866                |
| orf.1133797922164.1                       | 151            | ribosomal protein L7/L12                   | K02935 | -           | 22.5                         | 0.0                         | 28.7                        | 6.4                     | contig_32724           | 28602                  | 29055                |
| orf.1133801922342.1                       | 165            | ATP synthase F0, B subunit                 | K02109 | -           | 0.0                          | 0.0                         | 26.2                        | 5.6                     | contig_3658            | 74733                  | 75228                |
| orf.1133797922140.1                       | 232            | ribosomal protein L1                       | K02863 | -           | 0.0                          | 6.5                         | 24.9                        | 4.9                     | contig_32724           | 29585                  | 30281                |

<sup>a</sup> Highly-expressed genes were picked from biggest mRNA RPKM to tenth UniRef annotated gene for each conditions for each conditions (yellow highlighted). Upregulated genes showed red letters, while down-regulated genes showed blue letters.

<sup>b</sup> DNA frequency (DNA-RPKM) was an average of three operational conditions.

<sup>c</sup> Potential operons (gene cluster within the contig) were highlighted by different colors. To complete contig 2111 cluster, one hydrogenase gene was added.

Supplementary Table S13. Top10 highly-expressed annotated ORFs in Bin-genomes MS1 and Bet2.

| Peptide ID on JCVI metagenomic pipeline       | Peptide Length | UniRef Common name                                            | KO     | CytC family <sup>b</sup> | MFC <sup>a</sup> mRNA (RPKM) | SP <sup>a</sup> mRNA (RPKM) | OC <sup>a</sup> mRNA (RPKM) | DNA <sup>c</sup> (RPKM) | Contig ID <sup>d</sup> | ORF Start <sup>d</sup> | ORF End <sup>d</sup> |
|-----------------------------------------------|----------------|---------------------------------------------------------------|--------|--------------------------|------------------------------|-----------------------------|-----------------------------|-------------------------|------------------------|------------------------|----------------------|
| <b>Bin-genome MS1</b>                         |                |                                                               |        |                          |                              |                             |                             |                         |                        |                        |                      |
| <b>[condition MFC]</b>                        |                |                                                               |        |                          |                              |                             |                             |                         |                        |                        |                      |
| orf.1133802906078.1                           | 385            | S-layer-related duplication domain                            | -      | -                        | 8737.7                       | 8689.7                      | 9259.2                      | 95.3                    | contig_282             | 13234                  | 14389                |
| orf.1133802591016.1                           | 202            | monomethylamine methyltransferase mtmB                        | -      | -                        | 8133.5                       | 8192.1                      | 7791.7                      | 142.7                   | contig_3696            | 11429                  | 12035                |
| orf.1133802591038.1                           | 252            | monomethylamine methyltransferase mtmB                        | -      | -                        | 5590.3                       | 6126.9                      | 5993.9                      | 134.8                   | contig_3696            | 12050                  | 12806                |
| orf.1133802590892.1                           | 217            | monomethylamine corrinoid protein 1                           | K00548 | -                        | 5209.2                       | 5251.8                      | 4773.4                      | 132.9                   | contig_3696            | 10766                  | 11417                |
| orf.1133803173416.1                           | 112            | dimethylamine methyltransferase mtbB3                         | -      | -                        | 4864.5                       | 3583.4                      | 4276.4                      | 128.7                   | contig_3272            | 2060                   | 2396                 |
| orf.1133803173382.1                           | 224            | dimethylamine corrinoid protein 2                             | K00548 | -                        | 4372.0                       | 3737.2                      | 4070.3                      | 132.4                   | contig_3272            | 3472                   | 4144                 |
| orf.1133803173410.1                           | 355            | dimethylamine:corrinoid methyltransferase                     | -      | -                        | 4207.4                       | 3020.4                      | 3637.1                      | 126.4                   | contig_3272            | 2396                   | 3461                 |
| orf.1133802838476.1                           | 254            | methyltransferase cognate corrinoid proteins                  | K00548 | -                        | 4203.1                       | 3348.9                      | 3157.9                      | 65.4                    | contig_1540            | 7333                   | 8095                 |
| orf.1133802838514.1                           | 467            | methanol:corrinoid methyltransferase                          | -      | -                        | 3903.4                       | 2655.2                      | 2872.9                      | 66.2                    | contig_1540            | 5927                   | 7328                 |
| orf.1133802630752.1                           | 434            | methyl-coenzyme M reductase, beta subunit                     | K00401 | -                        | 3285.1                       | 3322.9                      | 3330.7                      | 64.1                    | contig_790             | 11913                  | 13215                |
| orf.1133802630774.1                           | 162            | methyl-coenzyme M reductase operon protein D                  | K03422 | -                        | 2860.2                       | 2662.3                      | 2778.4                      | 60.9                    | contig_790             | 13257                  | 13743                |
| orf.1133803063686.1                           | 76             | -                                                             | -      | -                        | 2858.6                       | 4078.9                      | 4309.0                      | 52.7                    | contig_2308            | 20466                  | 20694                |
| orf.1133803173454.1                           | 490            | amino acid/polyamine transporter I                            | -      | -                        | 2539.0                       | 1946.8                      | 2293.5                      | 57.9                    | contig_3272            | 483                    | 1953                 |
| orf.1133802630956.1                           | 572            | methyl-coenzyme M reductase, alpha subunit                    | K00399 | -                        | 2513.3                       | 2283.0                      | 2428.8                      | 64.5                    | contig_790             | 15125                  | 16841                |
| <b>[additional genes in conditions SP/OC]</b> |                |                                                               |        |                          |                              |                             |                             |                         |                        |                        |                      |
| orf.1133802630902.1                           | 252            | methyl-coenzyme M reductase, gamma subunit                    | K00402 | -                        | 2290.0                       | 2347.4                      | 2324.3                      | 58.6                    | contig_790             | 14355                  | 15111                |
| <b>Bin-genome Bet1</b>                        |                |                                                               |        |                          |                              |                             |                             |                         |                        |                        |                      |
| <b>[condition MFC]</b>                        |                |                                                               |        |                          |                              |                             |                             |                         |                        |                        |                      |
| orf.1133797721834.1                           | 187            | phasin family protein                                         | -      | -                        | 453.8                        | 352.4                       | 200.6                       | 10.6                    | contig_24274           | 894                    | 1455                 |
| orf.1133802765784.1                           | 493            | gram-negative porin                                           | -      | -                        | 216.9                        | 230.9                       | 184.4                       | 12.6                    | contig_1537            | 35739                  | 37218                |
| orf.1133801963992.1                           | 106            | bacterial DNA-binding protein                                 | K03530 | -                        | 176.1                        | 56.5                        | 68.0                        | 8.5                     | contig_10282           | 160                    | 478                  |
| orf.1133802530242.1                           | 834            | von willebrand factor type A                                  | -      | -                        | 126.2                        | 113.2                       | 124.6                       | 10.3                    | contig_7681            | 0                      | 2501                 |
| orf.1133803112048.1                           | 103            | -                                                             | K03704 | -                        | 98.9                         | 87.2                        | 28.0                        | 12.9                    | contig_1057            | 486                    | 795                  |
| orf.1133802766018.1                           | 165            | putative type 4 fimbrial biogenesis transmembrane protein     | K02655 | -                        | 82.3                         | 36.3                        | 61.2                        | 9.6                     | contig_1537            | 13833                  | 14328                |
| orf.1133802773962.1                           | 66             | ribosomal protein L35                                         | K02916 | -                        | 77.1                         | 0.0                         | 43.7                        | 13.2                    | contig_3660            | 9092                   | 9290                 |
| orf.1133803176920.1                           | 92             | ribosomal protein L7/L12                                      | K02935 | -                        | 73.8                         | 16.3                        | 0.0                         | 7.1                     | contig_1345            | 8606                   | 8882                 |
| orf.1133803421980.1                           | 107            | -                                                             | -      | -                        | 64.0                         | 70.6                        | 81.7                        | 11.7                    | contig_663             | 0                      | 320                  |
| orf.1133802214864.1                           | 251            | cytochrome c4                                                 | -      | (-2)                     | 60.9                         | 23.9                        | 5.7                         | 12.1                    | contig_11750           | 7827                   | 8580                 |
| orf.1133803378028.1                           | 672            | adenylylsulfate reductase, alpha subunit                      | K00394 | -                        | 58.1                         | 57.9                        | 38.6                        | 11.4                    | contig_9649            | 3023                   | 5039                 |
| orf.1133802939964.1                           | 121            | -                                                             | -      | -                        | 56.1                         | 49.5                        | 35.8                        | 7.4                     | contig_163             | 10528                  | 10891                |
| orf.1133802118342.1                           | 215            | -                                                             | -      | -                        | 55.3                         | 62.7                        | 67.1                        | 11.1                    | contig_8029            | 3325                   | 3970                 |
| orf.1133803580354.1                           | 63             | ribosomal protein L30                                         | K02907 | -                        | 53.9                         | 23.8                        | 0.0                         | 9.6                     | contig_2855            | 5134                   | 5323                 |
| <b>[additional genes in condition SP]</b>     |                |                                                               |        |                          |                              |                             |                             |                         |                        |                        |                      |
| orf.1133784456482.1                           | 60             | -                                                             | -      | -                        | 0.0                          | 49.9                        | 0.0                         | 11.3                    | contig_8894            | 3927                   | 4107                 |
| orf.1133803094172.1                           | 418            | membrane protein involved in aromatic hydrocarbon degradation | K06076 | -                        | 36.5                         | 46.6                        | 44.9                        | 9.0                     | contig_75              | 19393                  | 20647                |
| orf.1133802144036.1                           | 398            | translation elongation factor Tu                              | K02358 | -                        | 34.1                         | 45.2                        | 29.0                        | 29.8                    | contig_8037            | 5052                   | 6246                 |
| orf.1133803070042.1                           | 102            | -                                                             | -      | -                        | 0.0                          | 44.0                        | 0.0                         | 12.1                    | contig_7775            | 8071                   | 8377                 |
| orf.1133797879228.1                           | 69             | -                                                             | -      | -                        | 0.0                          | 43.4                        | 0.0                         | 3.7                     | contig_32915           | 2249                   | 2456                 |
| orf.1133797869568.1                           | 314            | GDP-mannose 4,6-dehydratase                                   | K01711 | -                        | 16.2                         | 43.0                        | 23.0                        | 2.9                     | contig_29607           | 0                      | 941                  |
| orf.1133802985956.1                           | 70             | -                                                             | -      | -                        | 24.2                         | 42.8                        | 0.0                         | 11.0                    | contig_3162            | 9680                   | 9890                 |
| orf.1133802606544.1                           | 109            | putative cytochrome c-552 nirM                                | -      | (-1)                     | 31.1                         | 41.2                        | 0.0                         | 10.6                    | contig_2422            | 801                    | 1128                 |
| orf.1133793146694.1                           | 264            | translation elongation factor Tu                              | K02358 | -                        | 12.9                         | 39.7                        | 5.5                         | 8.9                     | contig_98833           | 0                      | 792                  |
| <b>[additional genes in condition OC]</b>     |                |                                                               |        |                          |                              |                             |                             |                         |                        |                        |                      |
| orf.1133802184272.1                           | 196            | peroxiredoxin                                                 | K03386 | -                        | 8.7                          | 0.0                         | 110.4                       | 9.6                     | contig_2780            | 3426                   | 4014                 |
| orf.1133803008226.1                           | 99             | -                                                             | -      | -                        | 17.1                         | 0.0                         | 58.3                        | 6.6                     | contig_2955            | 3833                   | 4130                 |
| orf.1133803243438.1                           | 58             | -                                                             | -      | -                        | 0.0                          | 0.0                         | 49.7                        | 15.0                    | contig_358             | 3314                   | 3488                 |
| orf.1133797879220.1                           | 125            | -                                                             | -      | -                        | 13.6                         | 12.0                        | 46.2                        | 7.8                     | contig_32915           | 1855                   | 2230                 |
| orf.1133786276180.1                           | 98             | adenylylsulfate reductase, beta subunit                       | K00395 | -                        | 0.0                          | 30.9                        | 44.6                        | 14.6                    | contig_30872           | 1870                   | 2163                 |
| orf.1133797776814.1                           | 134            | lytic transglycosylase catalytic                              | -      | -                        | 0.0                          | 0.0                         | 43.2                        | 8.2                     | contig_21811           | 0                      | 401                  |

<sup>a</sup> Highly-expressed genes were picked from biggest mRNA RPKM to tenth UniRef annotated gene for each conditions for each conditions (yellow highlighted). Upregulated genes showed red letters, while down-regulated genes showed blue letters.

<sup>b</sup> c-type cytochrome family was defined by Bulter *et al.* (BMC Genomics, 2010, 11:40). Number of heme binding CXXCH domain is described in paraphrase.

<sup>c</sup> DNA frequency (DNA-RPKM) was an average of three operational conditions.

<sup>d</sup> Potential operons (gene cluster within the contig) were highlighted by different colors.



## SUPPLEMENTARY DISCUSSION

### ***Characterization of thirteen bin-genomes***

To accomplish the recovery of bin-genomes of highly abundant microbes in the complex microbial community, we clustered the assembled contigs by using mean contig coverage vs. G+C content plots as reported elsewhere (1). The contig clusters were further analyzed by a set of criteria that considered the predicted taxonomy, mean coverage, G+C content, and contig length (Supplementary Tables S2).

Using this method, we recovered thirteen bin-genomes overall (Table 1). Six of these bin-genomes (MS1, DB1, DB2, DF1, Bac1, and Bac2) showed notably high estimated genome completeness based on observed coverage of single-copy housekeeping genes (Supplementary Table S3-S4) (2, 3), indicating nearly-complete draft genomes of these six strains were recovered from the metagenome. Bin-genomes DM1, DF2, and Bet1 showed relatively larger numbers of contigs and less complete genomes than the other bin-genomes. The lower quality of these specific bin-genomes is likely due to the presence of phylogenetically closely related strains that assembled with a similar mean coverage, and/or micro-diversity between the strains resulting in different mean coverage but notably similar genomes (4). However, the assembly quality for those bin-genomes was sufficient for the subsequent analyses.

On the other hand, two bin-genomes (Chl1mix and DM2mix) showed duplicate or triplicate existence of the noted single-copy genes (Supplementary Table S3), suggesting that those clusters were mixtures of genomes from at least two different microbes, and were omitted from further metabolic network analyses. In total, eleven bin-genomes were recovered from the new metagenomic assembly and determined to be the dominant strains within the community. These bin-genomes were then utilized for reconstructing the metabolic networks within the community by performing comparative analyses of their gene expression profiles between before and after stimuli addition.

The 16S rRNA gene is generally used to affiliate bin-genomes to their taxonomic position and estimate their potential role in the community; however, it is difficult to assemble highly conserved genomic regions such as 16S rRNA (Supplementary Table S5). Therefore, we used three housekeeping proteins (RplE, NusA, and PheS) for analyzing the phylogenetic positions and taxonomic classification of each bin-genome if the bin-genomes did not include 16S rRNA sequence information (Supplementary Fig. S3-S6). This method provided the taxonomic assignment of the eleven bin-genomes (Table 1) and led to the first estimation of functional roles for each strain; *i.e.*, family *Methanosarcinaceae* (MS1) as a methanogen (5), families *Desulfobacteraceae* (DF1 and DF2) and *Desulfobulbaceae* (DB1 and DB2) as dissimilatory sulfate reducers (6), and *Desulfuromonadaceae* (DM1) as a dissimilatory iron reducer (7). These results also indicate that we successfully identified a bin-genome of the most dominant *Desulfuromonadaceae* strain DM1 from *Desulfuromonadales* pan-genome DM of the previous study (1), which is important for analyzing the strain-based metabolic network.

### ***Accurate community composition for complex microbial community***

Conventional community analyses, *i.e.* evaluating community structure based on the relative abundance of small subunit rRNA gene of each taxon, is convenient. However, there are some unavoidable issues due to the inconsistent copy numbers of ribosomal RNA gene operon per genome (8), ununiformed compatibility of universal primers to the 16S rRNA genes from various organisms for the PCR amplification (9), and difficulty to design primers that can amplify both Archaeal and Bacterial 16S rRNA genes (10). Although the 16S rRNA clone analysis showed appropriate identification of phylotypes with phylogenetic positions (Supplementary Fig. S3), the community composition is incorrect due to the reasons described above (1).

To gain more accurate view of the community composition by overcoming the issues, the metagenomics-based community composition analysis has been examined because the next generation sequencing (NGS) is theoretically less-biased with no PCR amplification than 16S rRNA-basis sequencing. Taxonomic assignment of each ORF by similarity search against UniRef (11) or NCBI-NR (12) are frequently used for raw read or ORF frequencies-basis community composition analysis such as MEGAN (13) and MG-RAST (14). However, the results from this method are considerably affected by the accumulation of adequate reference genomes, and never address uncultured taxa with no reference genome and also phylotype level information of the given communities.

Since our bin-genome effort by contig clustering enables to show the strain-level information as well as the unclassified taxa (like bin-genomes Unc1 and Unc2) in the community (Table 1), raw reads frequencies for each bin-genome are another option to identify community composition (Supplementary Table S5). The raw reads frequencies related to bin-genome and taxonomic assignment of contigs showed relatively accurate view of the community composition; however, the approach has potential errors in terms of microbial cell numbers mainly attributed by size of (bin)genomes and raw reads contamination of virus/plasmid. The sizes of genomes directly affect to raw reads frequencies such as bigger genome size overestimates the frequency because of more raw reads existence. We found several contigs taxonomically assigned as Superkingdom *Viruses* within our metagenomic assembly. Those contigs seem to represent miscellaneous viruses infected and amplified in the microbial cell body. At the case, it is better to omit viruses-associated raw reads for microbial community composition analysis. The plasmid-associated contigs are similar contaminant to consider accurate community composition analysis because their copy numbers within the microbial cell body are highly variable.

To overcome all concerns described above, we used core-gene frequencies based community composition by relative frequencies of sixteen single-copied housekeeping genes for each bin-genome (Fig. 2). The core-gene frequency based community composition analysis along with metagenomics was first reported using 31 proteins as the phylogenetic markers for *Bacterial* population analyses (15), and using 105 proteins for Archaeal phylogenetic markers (16). However, in anaerobic microbial ecosystems, both *Bacteria* and *Archaea* are often existed together in a community; thereby, we selected core genes that are present in both domains' genomes for the community analyses (Fig. 2A). To the end, core-gene frequencies based community composition would be most suitable way to reflect microbial cell numbers composition within the given communities (Fig. 2C).

### ***Stimulus-induced metatranscriptomics for natural environmental community***

In the natural environments, microbial communities are sometimes highly diverse (17) because the selective pressures are low and variable (18). In those cases, metagenomic sequence data can be complex and analytically challenging (19) to obtain sufficient genome-binning; however, if dominant organisms occupy more than 1.5% of a given community, their bin-genomes will be associated using our level of metagenomic sequencing (~100M reads and ~10 Gbp). Given advances in sequencing technologies which can now provide high coverage sequence data, the recovery of draft genomes from the highly diverse samples will continue to improve.

In addition, natural environments generally include multiple variables that impact microbial activities. For example, a diurnal cycle and depth dependency includes light intensity as well as temperature and oxygen concentration differences (20-22), which are both significant environmental changes relative to microbial activity. If these two environmental factors are divided into individual stimuli (e.g. temperature or light), we can separately analyze the effect of each factor that controls individual microbial activity and metabolism, or interspecies interaction in the complex microbial communities. Since the microbial community should respond by changing gene expression relative to the specified applied stimulus (e.g. only light intensity), our proposed stimulus-induced metatranscriptomics approach with genome-binning should be suitable in many natural environments for further understanding how environmental perturbations impact microbial function at a strain- and community-level.



## Supplementary Methods

### ***Selection of marker genes for analyzing cell activity and microbial metabolisms***

Microbial cell activity-associated marker genes were selected from the KEGG module or KEGG pathway databases (23). Transcription-associated marker gene sets are related to M00183 (RNA polymerase, bacteria), M00184 (RNA polymerase, Archaea), and bacterial sigma factors and other transcription-related factors from ko03021 (Transcription Machinery). Translation-associated marker gene sets are related to M00178 (Ribosome, bacteria), M00179 (Ribosome, Archaea), M00360 (prokaryotic Aminoacyl-tRNA biosynthesis), and M00335 (Sec system). Replication-associated marker gene sets are related to M00260 (Bacterial DNA polymerase III complex), M00264 (Archaeal DNA polymerase III complex), and *fts* and *dna* genes from ko03036 (Chromosome and associated proteins). Energy production-associated marker gene sets are related to M00157 (F-type ATPase) and M00159 (V-type ATPase), while oxidative stress response-associated genes are related to catalase or superoxide dismutase in KEGG orthology, and M00456 (anoxic redox control two-component regulatory system).

Microbial metabolism-associated marker genes were also selected from the KEGG module or KEGG pathway databases (23). Respiration-associated marker gene sets for soluble electron acceptors are related to M00567 (hydrogenotrophic methanogenesis), M00596 (Dissimilatory sulfate reduction), M00530 (Dissimilatory nitrate reduction), and ko00190 (Oxidative phosphorylation). EET respiration-associated marker gene sets are related to MH-cytC orthologous families established by Bulter *et al.* (24). The twelve key MH-cytC families were selected as cytochrome C<sub>3</sub> (PpcA, PpcD, PpcE, and family 2890), OmcS, OmcX, OmcB, OmcZ, OmcE, MacA, CymA, and family 51 (orf2 of cytochrome BC operon). Central carbon metabolism-associated marker genes are related to M00009/M00011 (Citrate cycle, TCA cycle), M00173 (Reductive citric acid cycle), M00001 (Glycolysis EMP), and M00003 (Gluconeogenesis). Substrate or byproduct-associated marker gene sets are related to M00377 (Reductive acetyl-CoA pathway), M00087 (beta-Oxidation), M00236 and M00237 (Amino acid transport systems), and M00239 (Peptides/Nickel transport system). The gene sets related to downstream process of acetyl-CoA are selected from ko00620 (Pyruvate metabolism), ko00010 (Glycolysis / Gluconeogenesis), and ko00640 (Propanoate metabolism). Hydrogenase gene sets are mainly selected from ko01000 (Enzymes) as EC:1.12.- (Oxidoreductase, Acting on hydrogen as donor) and manual selection of *hox* and *hyf* hydrogenase complex. Anaerobic sulfur metabolism-associated gene sets are selected from ko00920 (Sulfur metabolism) and *Desulfocapsa sulfexigens* metabolism (25).

## SUPPLEMENTARY REFERENCES

1. Ishii S, *et al.* (2013) A novel metatranscriptomic approach to identify gene expression dynamics during extracellular electron transfer. *Nat Commun* 4:1601.
2. Dupont CL, *et al.* (2012) Genomic insights to SAR86, an abundant and uncultivated marine bacterial lineage. *ISME J* 6:1186-1199.
3. Kawai M, *et al.* (2011) Evolution in an oncogenic bacterial species with extreme genome plasticity: *Helicobacter pylori* East Asian genomes. *BMC Microbiol* 11:104.
4. Albertsen M, *et al.* (2013) Genome sequences of rare, uncultured bacteria obtained by differential coverage binning of multiple metagenomes. *Nature Biotech* 31:533-538.
5. Garcia JL, Patel BK, & Ollivier B (2000) Taxonomic, phylogenetic, and ecological diversity of methanogenic Archaea. *Anaerobe* 6(4):205-226.
6. Klein M, *et al.* (2001) Multiple lateral transfers of dissimilatory sulfite reductase genes between major lineages of sulfate-reducing prokaryotes. *J Bacteriol* 183:6028-6035.
7. Lovley DR, Holmes DE, & Nevin KP (2004) Dissimilatory Fe(III) and Mn(IV) reduction. *Adv Microb Physiol* 49:219-286.
8. Klappenbach JA, Saxman PR, Cole JR, & Schmidt TM (2001) rrndb: the Ribosomal RNA Operon Copy Number Database. *Nuc Acid Res* 29:181-184.
9. Sipos R, *et al.* (2007) Effect of primer mismatch, annealing temperature and PCR cycle number on 16S rRNA gene-targeting bacterial community analysis. *FEMS Microbiol Ecol* 60:341-350.
10. Baker GC, Smith JJ, & Cowan DA (2003) Review and re-analysis of domain-specific 16S primers. *J Microbiol Method* 55:541-555.
11. Suzek BE, Huang H, McGarvey P, Mazumder R, & Wu CH (2007) UniRef: comprehensive and non-redundant UniProt reference clusters. *Bioinformatics* 23:1282-1288.
12. Benson DA, *et al.* (2013) GenBank. *Nuc Acid Res* 41:D36-42.
13. Huson DH, Auch AF, Qi J, & Schuster SC (2007) MEGAN analysis of metagenomic data. *Genome Res* 17:377-386.
14. Meyer F, *et al.* (2008) The metagenomics RAST server - a public resource for the automatic phylogenetic and functional analysis of metagenomes. *BMC Bioinformatics* 9:386.
15. Wu M & Eisen JA (2008) A simple, fast, and accurate method of phylogenomic inference. *Genome Biol* 9:R151.
16. Wu M & Scott AJ (2012) Phylogenomic analysis of bacterial and archaeal sequences with AMPHORA2. *Bioinformatics* 28:1033-1034.
17. Nacke H, *et al.* (2011) Pyrosequencing-based assessment of bacterial community structure along different management types in German forest and grassland soils. *PLoS One* 6:e17000.
18. Fierer N & Jackson RB (2006) The diversity and biogeography of soil bacterial communities. *PNAS* 103:626-631.
19. Delmont TO, *et al.* (2012) Structure, fluctuation and magnitude of a natural grassland soil metagenome. *ISME J* 6:1677-1687.
20. Kolber ZS, *et al.* (2001) Contribution of aerobic photoheterotrophic bacteria to the carbon cycle in the ocean. *Science* 292:2492-2495.
21. Poretsky RS, *et al.* (2009) Comparative day/night metatranscriptomic analysis of microbial communities in the North Pacific subtropical gyre. *Environ Microbiol* 11:1358-1375.

22. Klatt CG, *et al.* (2013) Temporal metatranscriptomic patterning in phototrophic Chloroflexi inhabiting a microbial mat in a geothermal spring. *ISME J* 7:1775-1789.
23. Kanehisa M, *et al.* (2008) KEGG for linking genomes to life and the environment. *Nucleic acids research* 36(Database issue):D480-484.
24. Butler JE, Young ND, & Lovley DR (2010) Evolution of electron transfer out of the cell: comparative genomics of six Geobacter genomes. *BMC Genomics* 11:40.
25. Finster KW, *et al.* (2013) Complete genome sequence of *Desulfocapsa sulfexigens*, a marine deltaproteobacterium specialized in disproportionating inorganic sulfur compounds. *Standards in genomic sciences* 8(1):58-68.
